# Sub-au imaging of water vapour clouds around four asymptotic giant branch stars

I. Bains,<sup>1,2\*</sup> R. J. Cohen,<sup>2</sup> A. Louridas,<sup>3,2</sup> A. M. S. Richards,<sup>2\*</sup>  
D. Rosa-González<sup>2,4</sup> and J. A. Yates<sup>1,5</sup>

<sup>1</sup>*Astronomy Group, Department of Physical Sciences, University of Hertfordshire, College Lane, Hatfield, Hertfordshire AL10 9AB*

<sup>2</sup>*Jodrell Bank Observatory, University of Manchester, Macclesfield, Cheshire SK11 9DL*

<sup>3</sup>*Electronic Engineering Laboratory, University of Kent at Canterbury, Canterbury, Kent CT2 7NT*

<sup>4</sup>*INAOE, Luis Enríque Erro 1, Tonantzintla, Puebla 72840, México*

<sup>5</sup>*Department of Physics and Astronomy, University College London, Gower Street, London WC1E 6BT*

Accepted 2002 October 30. Received 2002 October 30; in original form 2002 September 5

## ABSTRACT

We present MERLIN maps of the 22-GHz H<sub>2</sub>O masers around four low-mass late-type stars (IK Tau, U Ori, RT Vir and U Her), made with an angular resolution of  $\sim 15$  milliarcsec and a velocity resolution of  $0.1 \text{ km s}^{-1}$ . The H<sub>2</sub>O masers are found in thick expanding shells with inner radii  $\sim 6$  to 16 au and outer radii four times larger. The expansion velocity increases radially through the H<sub>2</sub>O maser regions, with logarithmic velocity gradients of  $0.5$ – $0.9$ . IK Tau and RT Vir have well-filled H<sub>2</sub>O maser shells with a spatial offset between the near and far sides of the shell, which suggests that the masers are distributed in oblate spheroids inclined to the line of sight. U Ori and U Her have elongated poorly filled shells with indications that the masers at the inner edge have been compressed by shocks; these stars also show OH maser flares. MERLIN resolves individual maser clouds, which have diameters of  $2$ – $4$  au and filling factors of only  $\sim 0.01$  with respect to the whole H<sub>2</sub>O maser shells. The circumstellar envelope velocity structure gives additional evidence the maser clouds are density-bounded. Masing clouds can be identified over a similar time-scale to their sound crossing time ( $\sim 2$  yr) but not longer. The sizes and observed lifetimes of these clouds are an order of magnitude smaller than for those around red supergiants, similar to the ratio of low-mass:high-mass stellar masses and sizes. This suggests that cloud size is determined by stellar properties, not local physical phenomena in the wind.

**Key words:** masers – stars: AGB and post-AGB – circumstellar matter – stars: evolution – stars: kinematics – stars: mass-loss.

## 1 INTRODUCTION

Stars that start life with a mass  $M_*$  of one or a few  $M_\odot$  usually end up as  $0.6$ – $1.0 M_\odot$  white dwarfs (WDs). Most of their mass loss occurs during and at the end of the asymptotic giant branch (AGB) stage, at rates of  $\dot{M} \approx 10^{-8}$ – $10^{-4} M_\odot \text{ yr}^{-1}$ , resulting in dusty, thick circumstellar envelopes (CSEs). Mass loss on the AGB determines the final stages of evolution of low- and intermediate-mass stars and significantly contributes to the chemical evolution of galaxies, in particular providing up to 80 per cent of the dust (Whittet 1992).

AGB stars contain a degenerate WD-like core surrounded by a shell enriched with CNO-cycle elements and other products of high-temperature nucleosynthesis, which are brought to the stellar surface by convection and major dredge-up events known as thermal pulses. As stars enter the AGB their optical pulsation periods  $P$  become

longer and more regular, of the order of a year. The outer layers are cool (typically  $2000$ – $2500$  K) and very extended (radius  $R_* \gtrsim 1$  au), with a luminosity  $L_*$  of a few  $\times 10^3 L_\odot$ . The CSE becomes thicker during the AGB lifetime of a few times  $10^4$ – $10^5$  yr (Jura 1993). More massive stars have shorter lifetimes but lose mass at a higher rate (Vassiliadis & Wood 1993, 1994; Blöcker 1995). Finally, the remnants of the stellar shell heat up and are lost in a superwind, leading to a planetary nebula (PN) surrounding a WD.

Van der Veen & Habing (1988) located Miras, OH/IR stars and proto-PNe (PPNe) on the *IRAS* colour–colour diagram along a curve corresponding to increasingly thicker and cooler CSEs. Jura (1993) suggested that Mira periods continue to lengthen on the AGB, but Whitelock et al. (1994) presented evidence that Miras with  $P \lesssim 400$  d are a separate population from longer period objects. Semi-regular variables (SRa,b) are generally reported to have lower mass-loss rates than Miras and could be stars entering (Kerschbaum & Hron 1992) or leaving (Young, Phillips & Knapp 1993) the AGB.

\*E-mail: ib@star.herts.ac.uk (IB); amsr@jb.man.ac.uk (AMSR)

It is generally agreed that the stellar pulsations levitate the photosphere (Bowen 1988) until it is cool enough for dust grains to nucleate and grow at a few  $R_*$ , as described by Gail & Sedlmayr (1994, 1998, 1999). Radiation pressure on dust then drives the wind away from the star via collisions with the gas.

The CSEs of O-rich stars produce masers including SiO,  $H_2O$  22-GHz, OH mainline and OH 1612-MHz emission (Cohen 1989). High-resolution mapping of the winds from red supergiants (RSGs) of  $M_* \gtrsim 10 M_\odot$  shows discrete  $H_2O$  vapour clouds 5–15 au in radius which are 1–2 orders of magnitude denser than the surrounding wind (Richards, Yates & Cohen 1999). No direct measurements of the unbeamed sizes of  $H_2O$  maser clouds around Miras have previously been published. The  $H_2O$  maser regions of AGB stars at distances of a few 100 pc are  $\sim 100$  mas in radius.

We observed four nearby AGB stars, IK Tau, U Ori, RT Vir and U Her, at 22 GHz using the Multi Element Radio Linked Interferometer Network (MERLIN). Its baselines correspond to angular scales from about 10 to 200 milli-arcseconds (mas), allowing us to image  $H_2O$  masers at high resolution and still detect all of the extended flux (Section 3.1). All four stars have 9.7- $\mu\text{m}$  silicate features in emission (Olmon et al. 1986) and similar warm *IRAS* colours,  $\log(F_{25}/F_{12}) < 0$ , where  $F_{25}$  and  $F_{12}$  are the 25- and 12- $\mu\text{m}$  fluxes respectively. Other properties taken from the literature are given in Table 1. The absolute position of the star is given in column (2) and its velocity  $V_*$  with respect to the local standard of rest ( $V_{\text{LSR}}$ ) is given in column (3). The period  $P$  is given in column (4). IK Tau, U Ori and U Her have regular periods and are classed as Mira variables; RT Vir is an SRb with no clear optical period. The optical

magnitude range  $m_V$  is given in column (5) of Table 1. The distance  $d$  in column (6) is most reliable for RT Vir. The estimates for IK Tau and U Ori using various methods agree with the results of the period–luminosity relationship within the uncertainties. For U Her this method gives double the distance derived from OH parallax. For all three Miras the values of  $d$  are model-dependent, and for simplicity in all future calculations we use the *Hipparcos* distance of 133 pc for RT Vir and 266 pc for the other stars. The values quoted for the mass-loss rates  $\dot{M}_{\text{CO}}$  in column (7) assume a gas–dust ratio of 120–200 and a fractional CO number density of  $2\text{--}5 \times 10^{-4}$ . The CO data also provide the maximum expansion velocities and sizes of the CSEs in columns (8) and (9) respectively: see Section 4.3. In Section 2 we describe our observations and in Section 3 we present the observational results. Our analysis of the kinematics and dynamics of the circumstellar envelopes is given in Section 4. We investigate the properties of individual water maser clouds in Section 5. We summarize our findings on maser clouds and the properties of AGB stellar winds in Section 6.

## 2 OBSERVATIONS AND DATA REDUCTION

The four stars were observed in 1994 April using five telescopes of MERLIN: the Mk2 telescope at Jodrell Bank and outstation telescopes at Pickmere, Darnhall, Knockin and Cambridge. The maximum baseline was 217 km, giving a minimum fringe spacing of 13 mas at 22.235 GHz. Table 2 gives further details of the observations, including the date and duration of the observations and the central velocity of the MERLIN spectral band  $V_{\text{LSR}}$  [columns

**Table 1.** The properties of the stars and their circumstellar envelopes.

| Source     | Position (J2000)           | $V_*$                  | $P$                                   | $m_V$       | $d$                           | $\dot{M}_{\text{CO}}$     | $V_{\text{max}}$       | $r_{\text{CO}}$                            |
|------------|----------------------------|------------------------|---------------------------------------|-------------|-------------------------------|---------------------------|------------------------|--------------------------------------------|
| (1)        | (hh mm ss.sss+dd mm ss.ss) | ( $\text{km s}^{-1}$ ) | (d)                                   | (magnitude) | (pc)                          | $M_\odot \text{ yr}^{-1}$ | ( $\text{km s}^{-1}$ ) | (au)                                       |
|            | (2)                        | (3)                    | (4)                                   | (5)         | (6)                           | (7)                       | (8)                    | (9)                                        |
| IK Tau     | 03 53 28.83 +11 24 20.5    | +34.0                  | 470                                   | 10.8–16.5   | $265 \pm 5_{45}$              | $2.6 \times 10^{-6}$      | 21.3                   | 6320, 26000                                |
| U Ori      | 05 55 49.169 +20 10 30.69  | −39.5                  | 368                                   | 4.8–13.0    | $260 \pm 50$                  | $2.3 \times 10^{-7}$      | 7.5                    | 7000                                       |
| RT Vir     | 13 02 37.982 +05 11 08.38  | +18.2                  | 155,<br>112 $\pm$ 11<br>& 170 $\pm$ 7 | 7.4–8.7     | $133 \pm 20$                  | $1.3 \times 10^{-7}$      | 8.8                    | (2035 $\times$ 1100)<br>$\pm 320$ p.a. 30° |
| U Her      | 16 25 47.471 +18 53 32.87  | −14.5                  | 406                                   | 6.4–13.4    | $190 \pm 70$ ,<br>$385 \pm 5$ | $3.4 \times 10^{-7}$      | 11.5                   | 5400                                       |
| References |                            |                        |                                       |             |                               |                           |                        |                                            |
| IK Tau     | M98                        | K87                    | G98                                   | G98         | H97                           | O98, B00                  |                        | B89, K85                                   |
| U Ori      | H97                        | C91                    | G98                                   | G98         | C91                           | K98                       |                        | Y95                                        |
| RT Vir     | H97                        | N86                    | G98, E01                              | G98         | H97                           | K98, K99                  |                        | S95                                        |
| U Her      | H97                        | C94                    | G98                                   | G98         | vL00, C94                     | Y95                       |                        | Y95                                        |

### Notes

- (2) The position of IK Tau is accurate to better than 1 arcsec; the positions of the other stars are accurate to  $\sim 10$  mas.
- (3)  $V_{\text{LSR}}$  measurements derived from OH and SiO maser data, accurate to better than  $0.5 \text{ km s}^{-1}$ .
- (4) RT Vir varies irregularly. OH data (E01) suggest multiple periodicity. The periods of the other stars are accurate to within 10 d.
- (5) IK Tau and RT Vir are zodiacal and have poorly sampled optical periods; IK Tau is also heavily obscured by its thick CSE.
- (6) In this analysis we adopt a distance of 133 pc for RT Vir and 266 pc for the other sources.
- (7) We used the distances given in note (6) and the most recent CO data available to calculate  $\dot{M}_{\text{CO}}$  by the method of Groenewegen et al. (1999). Almost all available CO and infrared data from the literature give results that agree to within a factor of 5.
- (8) Maximum CO or thermal SiO expansion velocity, references as for (6). The discrepancy between these values and previous measurements is  $\approx \pm \frac{1}{3} \text{ km s}^{-1}$ .
- (9) Maximum radius of CO emission, adjusted to our adopted distances.

### References

B00: Bieging, Shaked & Gensheimer (2000); B89: Bujarrabal, Gómez-González & Planesas (1989); C91: Chapman et al. (1991); C94: Chapman et al. (1994); E01: Etoke et al. (2001); G98: Kholopov et al. (1998); H97: *Hipparcos* Catalogue (1997); K85: Knapp & Morris (1985); K87: Kिरrane (1987); K98: Knapp et al. (1998); K99: Kerschbaum & Olofsson (1999); M98: Monet et al. (1998); N86: Nyman, Johansson & Booth (1986); O98: Olofsson et al. (1998); S95: Stanek et al. (1995); Y95: Young (1995); vL00: van Langevelde et al. (2000).

**Table 2.** Details of MERLIN 22-GHz observations, including the restoring beams and noise levels in quiet channels for data cubes made at full resolution.

| Source | Date       | Integ | $V_{\text{LSR}}$       | $\Theta_{\text{B}}$ | $\sigma_{\text{rms}}$      |
|--------|------------|-------|------------------------|---------------------|----------------------------|
| (1)    | (yy mm dd) | time  | ( $\text{km s}^{-1}$ ) | (mas)               | ( $\text{mJy beam}^{-1}$ ) |
| (1)    | (2)        | (3)   | (4)                    | (5)                 | (6)                        |
| IK Tau | 940415     | 11.0  | +34                    | 15                  | 10                         |
| U Ori  | 940417     | 12.6  | -39                    | 15                  | 12                         |
| RT Vir | 940416     | 11.8  | +18                    | 20                  | 12                         |
| U Her  | 940413     | 13.7  | -15                    | 15                  | 14                         |

(2), (3) and (4) respectively]. Here and elsewhere radial velocities are given with respect to the local standard of rest (LSR). We used a spectral bandwidth of 2 MHz divided into 256 frequency channels, which gave a velocity resolution of  $0.1 \text{ km s}^{-1}$ . The quasar 3C 84 was observed for  $\sim 1$  h once or twice at the appropriate frequency for each source. It had a flux density of  $23 \pm 1 \text{ Jy}$  at that time (Teräsranta et al. 1998), and was used to calibrate the bandpass and set the flux scale for each source, with a final accuracy of  $\sim 10$  per cent.

We reduced the data as described in Richards et al. (1999) for 22-GHz observations, using local MERLIN-specific programs and AIPS. Left-hand (LHC) and right-hand circular (RHC) polarization data were observed and calibrated separately and simultaneously, but all maps were made in total intensity. About 10 per cent of the data were unusable, mainly because of bad weather. We derived corrections for phase and amplitude errors using self-calibration only, so we could not obtain accurate absolute positions. We reweighted the calibrated data to attain the optimum combination of resolution and sensitivity, and mapped and CLEANED each source using the AIPS task IMAGR.

The FWHM (full width at half-maximum) of the restoring beam ( $\Theta_{\text{B}}$ ) is given in column (5) of Table 2. The MERLIN beam at these declinations is moderately elliptical, but using a circular restoring beam of equivalent area did not introduce any artefacts and makes the maps easier to interpret. The typical rms noise for quiet channels,  $\sigma_{\text{rms}}$ , is given in column (6). In the presence of bright emission (exceeding  $1 \text{ Jy beam}^{-1}$ ) the noise can be  $\sim 1$  per cent of the channel peak because of deconvolution errors arising from the sparse baseline coverage. Note that these parameters refer to the data cubes mapped at full velocity resolution ( $0.105 \text{ km s}^{-1}$ ), which were used for all quantitative analysis of individual maser clouds. Additional maps were made at lower spatial and velocity resolution to study the overall properties of the  $\text{H}_2\text{O}$  envelopes at greater sensitivity. Some of these maps are presented in Figs 2 to 4 (see later).

We fitted 2D elliptical Gaussian components to each patch of emission in each channel in each data cube in order to measure the peak flux density  $I_{\text{c}}$ , the position relative to the reference feature used for self-calibration, the total area and the total flux density  $S_{\text{c}}$ . The relative position uncertainty  $\sigma_{\text{pos}}$  is proportional to the (dirty beam size)/(signal-to-noise ratio), as described analytically by Condon (1997) and Condon et al. (1998) and adapted for the MERLIN beam by Richards (1997) and Richards et al. (1999). This is typically 1 mas for an isolated component with  $I_{\text{c}} \approx 1 \text{ Jy beam}^{-1}$  and  $0.1 \text{ mas}$  for  $I_{\text{c}} \gtrsim 10 \text{ Jy beam}^{-1}$ . The FWHM of each component,  $s$ , was found by deconvolving the restoring beam from the component area, with an uncertainty  $\sigma_s = \sqrt{2}\sigma_{\text{pos}}$ .

The fitted components were grouped into features if three or more components with  $I_{\text{c}} > 3\sigma_{\text{rms}}$  occurred in adjacent channels with positions overlapping to within the position error or component

size. Non-matched components were discarded, as were any others that coincided with the beam sidelobe structure.

### 3 OBSERVATIONAL RESULTS

#### 3.1 MERLIN spectra and maps

Maps of the integrated 22-GHz emission from each source are shown in Fig. 1. The emission comes in each case from elliptical regions  $\sim 0.3$  arcsec in extent, in which are embedded hot spots  $\sim 20$  mas in extent which contribute most of the flux. Table 3 lists for each source the total angular extent of the emission detected at the  $5\sigma_{\text{rms}}$  level,  $\Delta\theta_{\text{tot}}$  [column (2)], together with the stellar velocity [column (3)], the minimum and maximum of Doppler velocity [columns (4)–(5)] and the range  $\Delta V_{\text{LSR}}$  [column (6)], the peak flux density  $S_{\text{peak}}$  [column (7)] and the integrated emission  $S_{\text{tot}}$  [column (8)]. Fig. 1 also shows estimated stellar positions derived in Section 4.1. It is clear that in each case the brightest emission is mostly found towards the outer parts of the  $\text{H}_2\text{O}$  envelope, with little emission from the direction of the star.

Figs 2 to 5 show the results in more detail: a MERLIN spectrum for each source, together with maps of the emission integrated over velocity ranges of  $\sim 1.2 \text{ km s}^{-1}$ . Individual channel maps contain mostly well-separated, slightly resolved patches of emission. Comparison with single-dish data (autocorrelations and independent monitoring: e.g. Rudnitskij et al. 2000) shows that MERLIN detected all the flux to within the errors ( $\leq 10$  per cent). Note, however, that the extreme redshifted emission from IK Tau extends right up to (and possibly beyond) the edge of our observing band. Henceforth red- and blueshifted are used to denote emission with  $V_{\text{LSR}} > V_*$  and  $V_{\text{LSR}} < V_*$  respectively.

Fig. 6 shows the positions of the fitted maser components in each channel, with grey-scale used to indicate velocity. In Section 5 we analyse the properties of the individual maser components. Here we concentrate on the global aspects of the maser distributions around each star. Results for each source are given in the following four sections.

#### 3.2 IK Tau

IK Tau has the most complex spectrum and the widest velocity range of the four sources that we studied. There are two bright spectral peaks asymmetrically distributed on either side of the stellar velocity: the blueshifted peak by  $6 \text{ km s}^{-1}$  and the redshifted peak by  $12 \text{ km s}^{-1}$ . The channel maps of IK Tau show that these bright emission peaks are due to multiple bright clumps spread over an elliptical region  $\sim 200$  mas east–west and  $\sim 100$  mas north–south. Fainter clumps of emission are found in all channels, from an almost spherical region. Moderately blueshifted emission to the west tends to be brighter than that to the east; the opposite is true for redshifted emission. At velocities close to  $V_*$  a clump to the south dominates the emission. The extreme red- and blueshifted emission features are offset towards the east.

Previous MERLIN observations by Yates & Cohen (1994) in 1985 detected only the bright elliptical region of emission but not the fainter spherical envelope. No individual maser features from the earlier MERLIN maps can be matched to features in the new maps. On the other hand, Yates & Cohen (1994) found a close correspondence between MERLIN and Very Large Array (VLA) maps made 16 months apart (Lane et al. 1987; Bowers, Claussen & Johnston 1993). Many maser features had survived over that

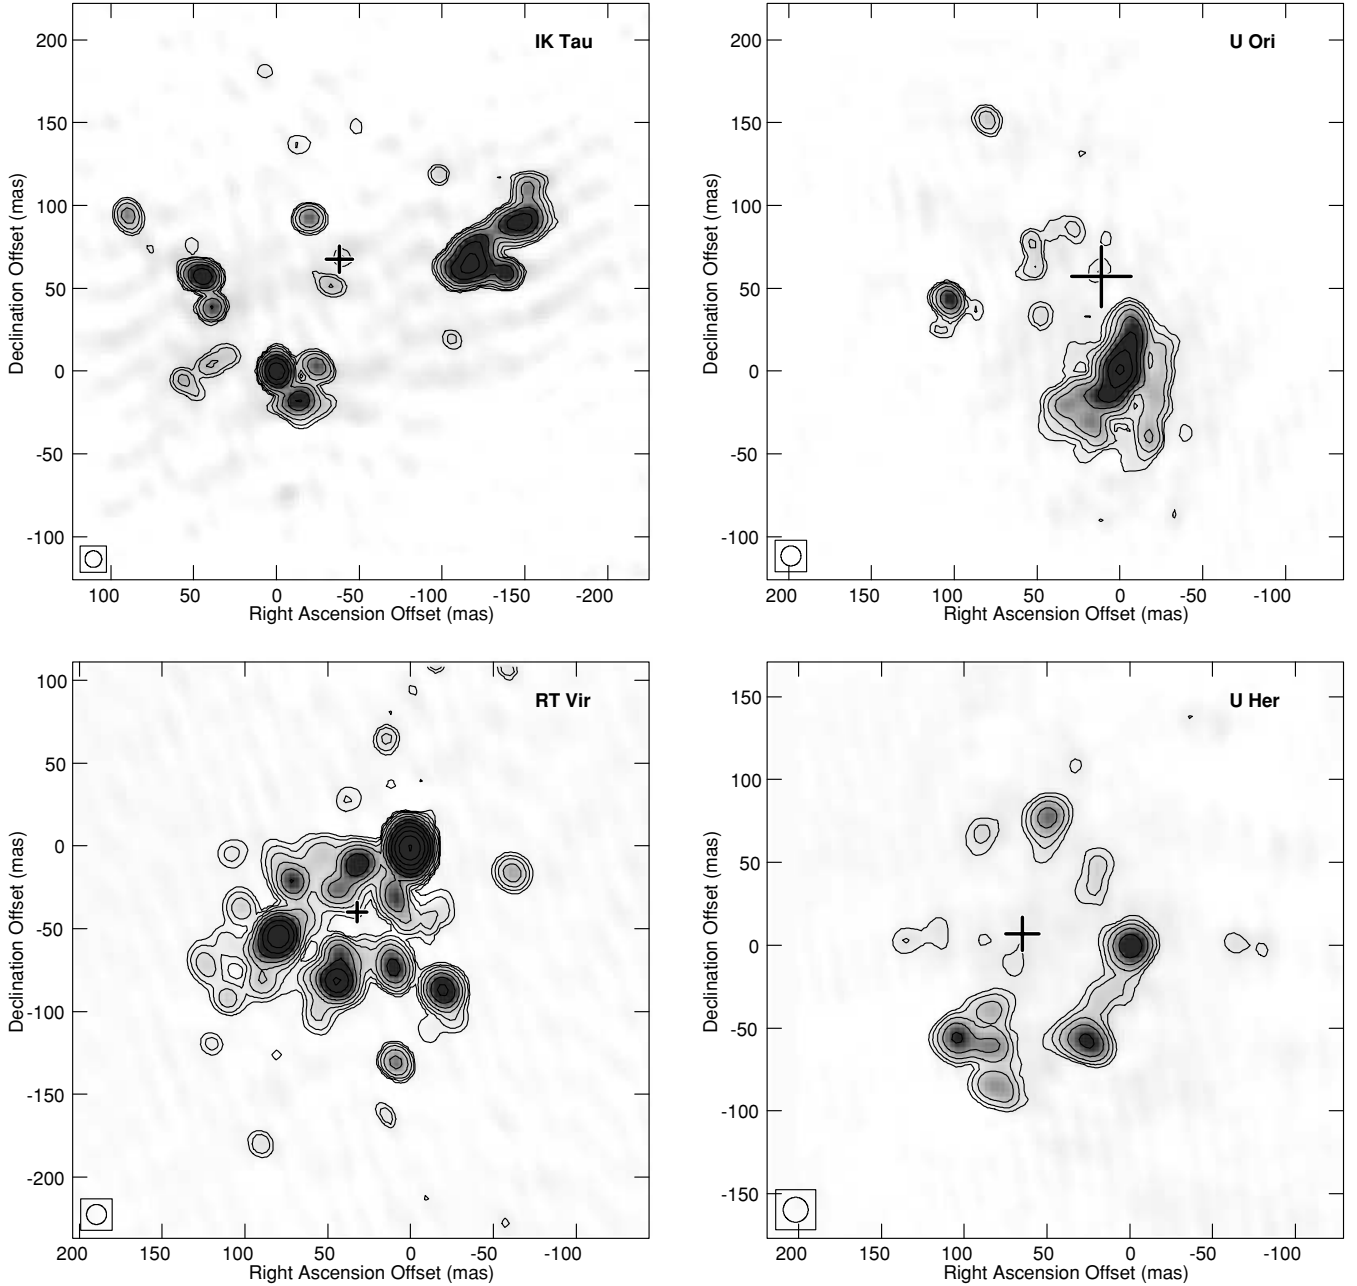

**Figure 1.** Integrated H<sub>2</sub>O maser emission from four AGB stars observed by MERLIN in 1994 April. The origin is at the position of the reference feature. The cross shows the estimated stellar position (Section 4.1). The restoring beam is shown in the lower left corner. The grey-scale shows all emission; the contour plots were made after blanking each channel at its  $5\sigma_{\text{rms}}$  level. The contour levels are at  $(1, 2, 4, \dots) \times$  the lowest contour level. This is at 0.1, 0.05, 0.3 and 0.3 Jy km s<sup>-1</sup> beam<sup>-1</sup> for IK Tau, U Ori, RT Vir and U Her respectively.

**Table 3.** Global properties of the H<sub>2</sub>O maser envelopes.

| Source | $\Delta\theta_{\text{tot}}$<br>(mas) | $V_*$<br>(km s <sup>-1</sup> ) | $V_{\text{LSR}}$ range<br>min max<br>(km s <sup>-1</sup> ) |              | $\Delta V_{\text{LSR}}$<br>(km s <sup>-1</sup> ) | $S_{\text{peak}}$<br>(Jy) | $S_{\text{tot}}$<br>(Jy km s <sup>-1</sup> ) |
|--------|--------------------------------------|--------------------------------|------------------------------------------------------------|--------------|--------------------------------------------------|---------------------------|----------------------------------------------|
| (1)    | (2)                                  | (3)                            | (4)                                                        | (5)          | (6)                                              | (7)                       | (8)                                          |
| IK Tau | 445                                  | +34.0                          | +21.2                                                      | $\geq +46.7$ | $\geq 25.5$                                      | 25                        | $\geq 108$                                   |
| U Ori  | 235                                  | -39.5                          | -41.5                                                      | -34.8        | 6.7                                              | 26                        | 20                                           |
| RT Vir | 370                                  | +18.2                          | +9.5                                                       | +26.6        | 17.1                                             | 394                       | 755                                          |
| U Her  | 300                                  | -14.5                          | -22.4                                                      | -9.8         | 12.6                                             | 22                        | 45                                           |

time-period and Yates & Cohen (1994) were able to measure expansion of the H<sub>2</sub>O maser envelope.

Although the overall appearance of the envelope in 1994 is of a spherically symmetric shell, nevertheless there is a clear offset between the near and far sides of the shell, with redshifted emission mainly to the east and blueshifted emission mainly to the west. This is particularly noticeable in Fig. 6. The east–west velocity segregation can be explained if the shell has an equatorial density enhancement so that the brightest masers lie in an oblate spheroid. The plane of the equator is at an angle of inclination  $i$  to the line of sight, with the eastern end of the polar axis approaching us. Hale et al. (1997) report that 3.1- $\mu\text{m}$  speckle interferometry shows an approximately circular disc of warm dust 140 mas in diameter with

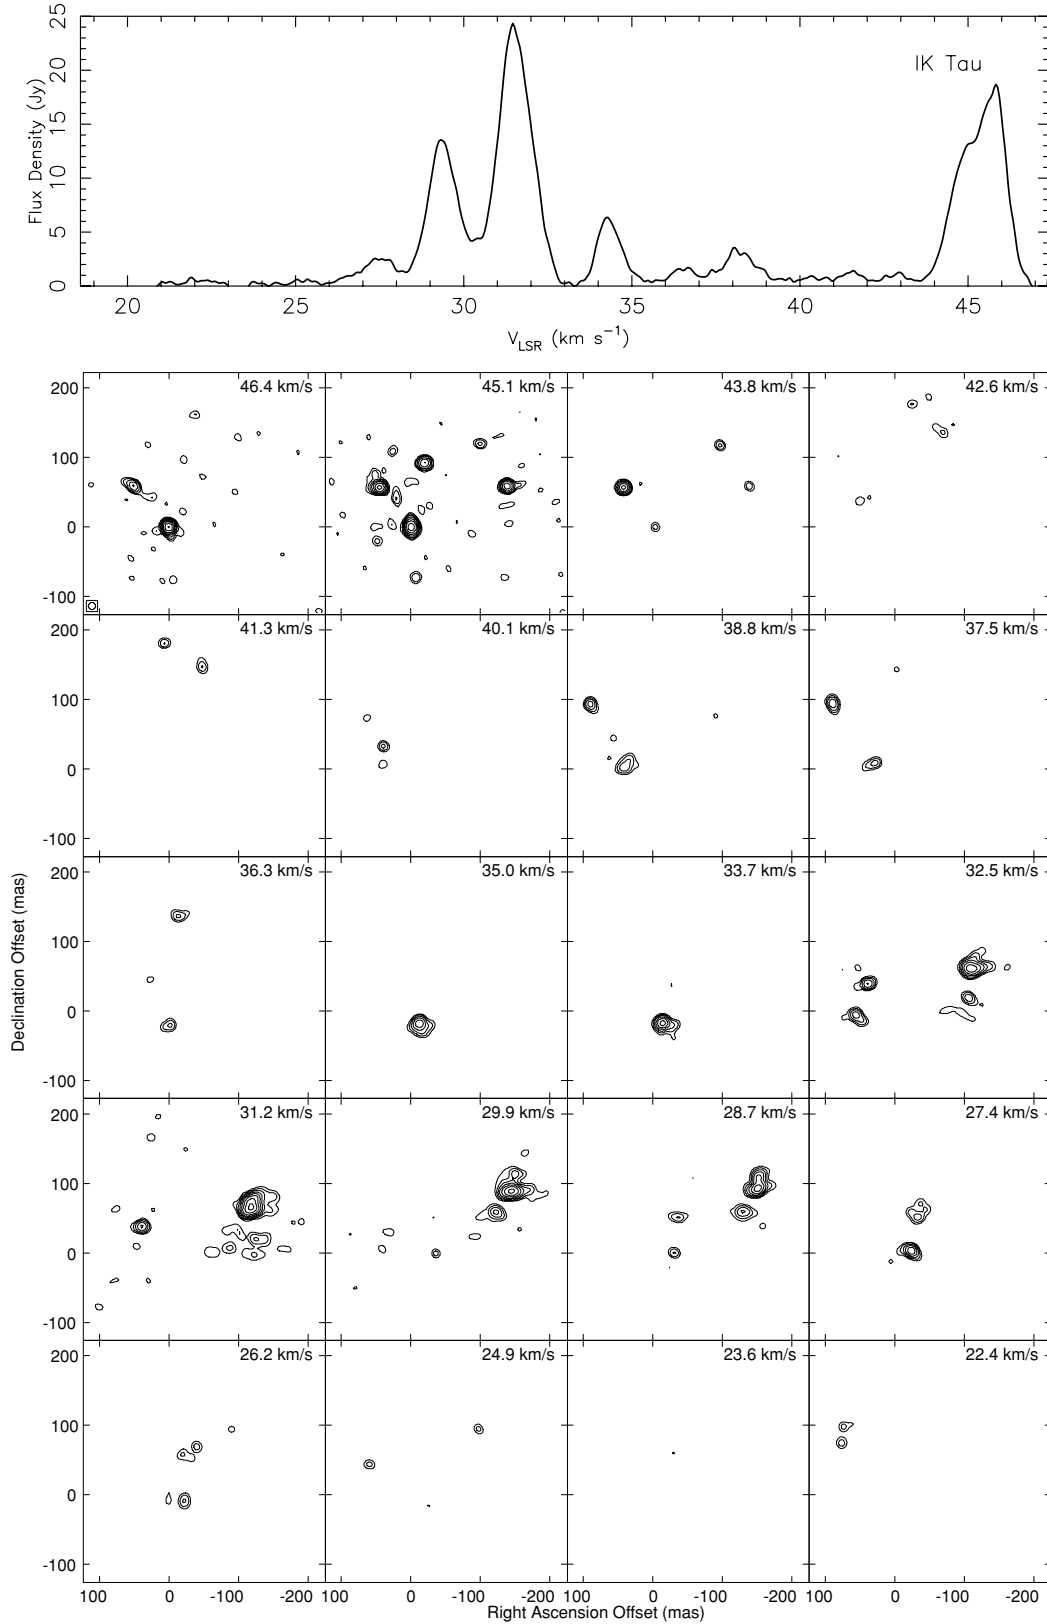

**Figure 2.** Top: MERLIN spectrum of IK Tau 22-GHz emission. Bottom: maps of emission integrated every 12 channels. The origin is at the position of the reference feature. Each panel is labelled with the central velocity. The contour levels are  $(1, 2, 4, \dots) \times 0.04 \text{ Jy beam}^{-1}$ . The restoring beam is shown in the first panel. The panels containing the brightest emission (at 46.4, 45.1 and 31.2 km s<sup>-1</sup>) contain some artefacts arising from dynamic range limitations.

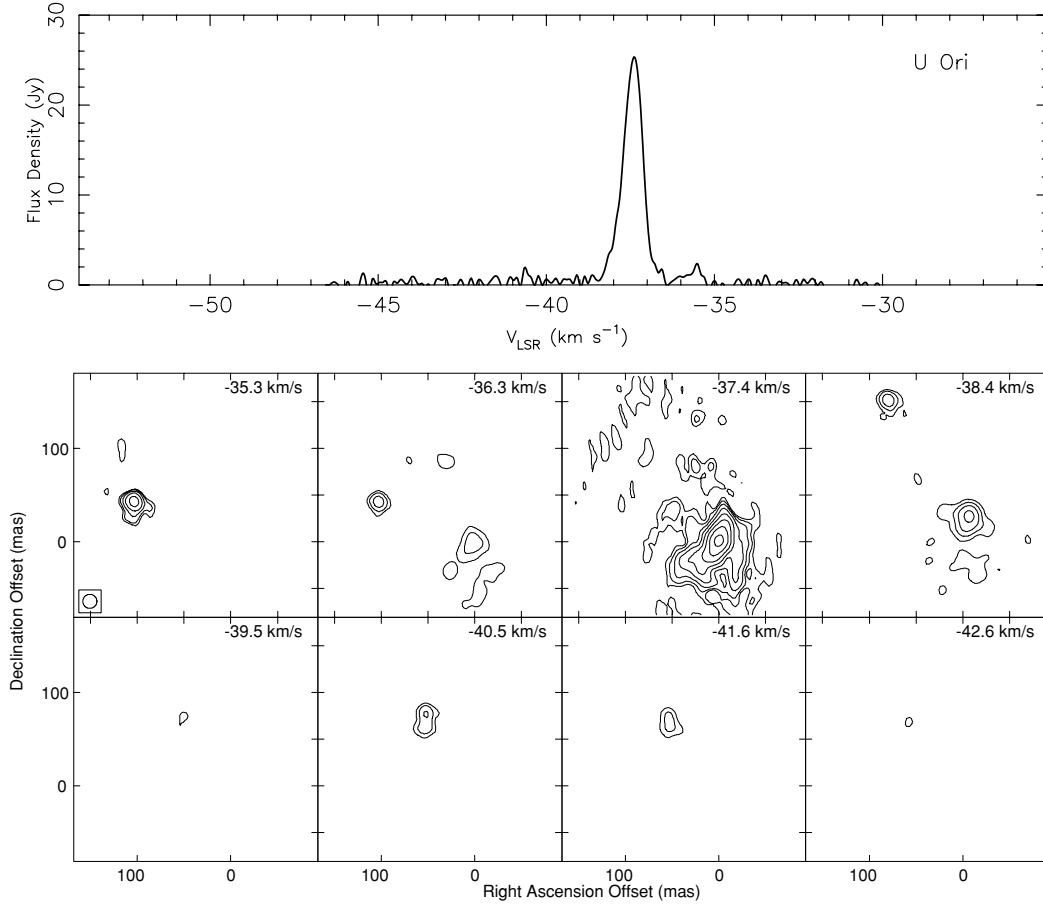

**Figure 3.** Top: MERLIN spectrum of U Ori 22-GHz emission. Bottom: maps of emission integrated every 10 channels. The origin is at the position of the reference feature. Each panel is labelled with the central velocity. The contour levels are  $(1, 2, 4, \dots) \times 0.04 \text{ Jy beam}^{-1}$ . The restoring beam is shown in the first panel. The panel containing the brightest emission (at  $-37.4 \text{ km s}^{-1}$ ) contains some artefacts arising from dynamic range limitations.

a resolution of 40 mas. If this is the projection of the inner regions of the H<sub>2</sub>O maser shell, with a minimum axial ratio within the uncertainty, this constrains  $i \gtrsim 45^\circ$ . Fig. 2 of Bowers (1991) shows model maps for an oblate spheroid at  $i = 45^\circ$  producing an asymmetric appearance at velocities around mid-way between  $V_*$  and the extreme velocities. This model does not include acceleration, which produces brighter tangential beaming. Kirrane (1987) found that the OH mainline masers trace a biconical outflow with a wide opening angle, surrounded by OH 1612-MHz masers in the equatorial region, with  $i \approx 60^\circ$ .

### 3.3 U Ori

U Ori has the narrowest velocity range of the four sources, with a single dominant spectral peak at a redshift of  $2 \text{ km s}^{-1}$  and mainly redshifted emission. The brightest emission, at  $-37.4 \text{ km s}^{-1}$ , comes from an extended region to the south-west, while the remainder of the emission is to the north and east. The distribution as a whole is elongated north-east–south-west, at a position angle of  $\sim 30^\circ$ . The maser envelope is the most sparsely filled of the four that we studied (Fig. 6).

U Ori has been monitored at 22 GHz by Rudnitskij et al. (2000) since 1980 using the Pushchino single-dish radio telescope. They observed H<sub>2</sub>O maser flares, which they proposed arise as a result of shocks propagating radially out from the star. Spectacular OH maser

flares have also been observed (Pataki & Kolena 1974; Chapman & Cohen 1985, and references therein).

Bowers & Johnston (1994) mapped U Ori in 1988 using the VLA and found a similar elongated distribution at position angle  $\sim 60^\circ$ . The major difference between our maps and theirs is that they detected weak blueshifted emission out to  $-49 \text{ km s}^{-1}$  near the centre of the distribution, close to our estimated stellar position. The position angle of the H<sub>2</sub>O envelope observed by Bowers & Johnston (1994) in 1988 is identical to the position angle of the OH 1612-MHz maser flare measured by Chapman & Cohen (1985) in 1983.

### 3.4 RT Vir

RT Vir has the greatest 22-GHz peak flux density and total flux of the four sources, with two bright spectral peaks  $\sim 5 \text{ km s}^{-1}$  each side of the stellar velocity.

The emission has an angular extent  $\leq 370$  mas, containing an inner ring of bright masers  $\sim 150$  mas in diameter. As in IK Tau, the emission contributing to the strongest spectral peaks is due to many compact maser regions spread over a large region. The total extent of the emission region is greatest near the stellar velocity and least near the extreme velocities, as expected for an expanding spherical shell, but again as in IK Tau the extreme red- and blueshifted features are displaced from each other. Extreme blueshifted emission from RT Vir comes from near the centre of the channel maps, but the

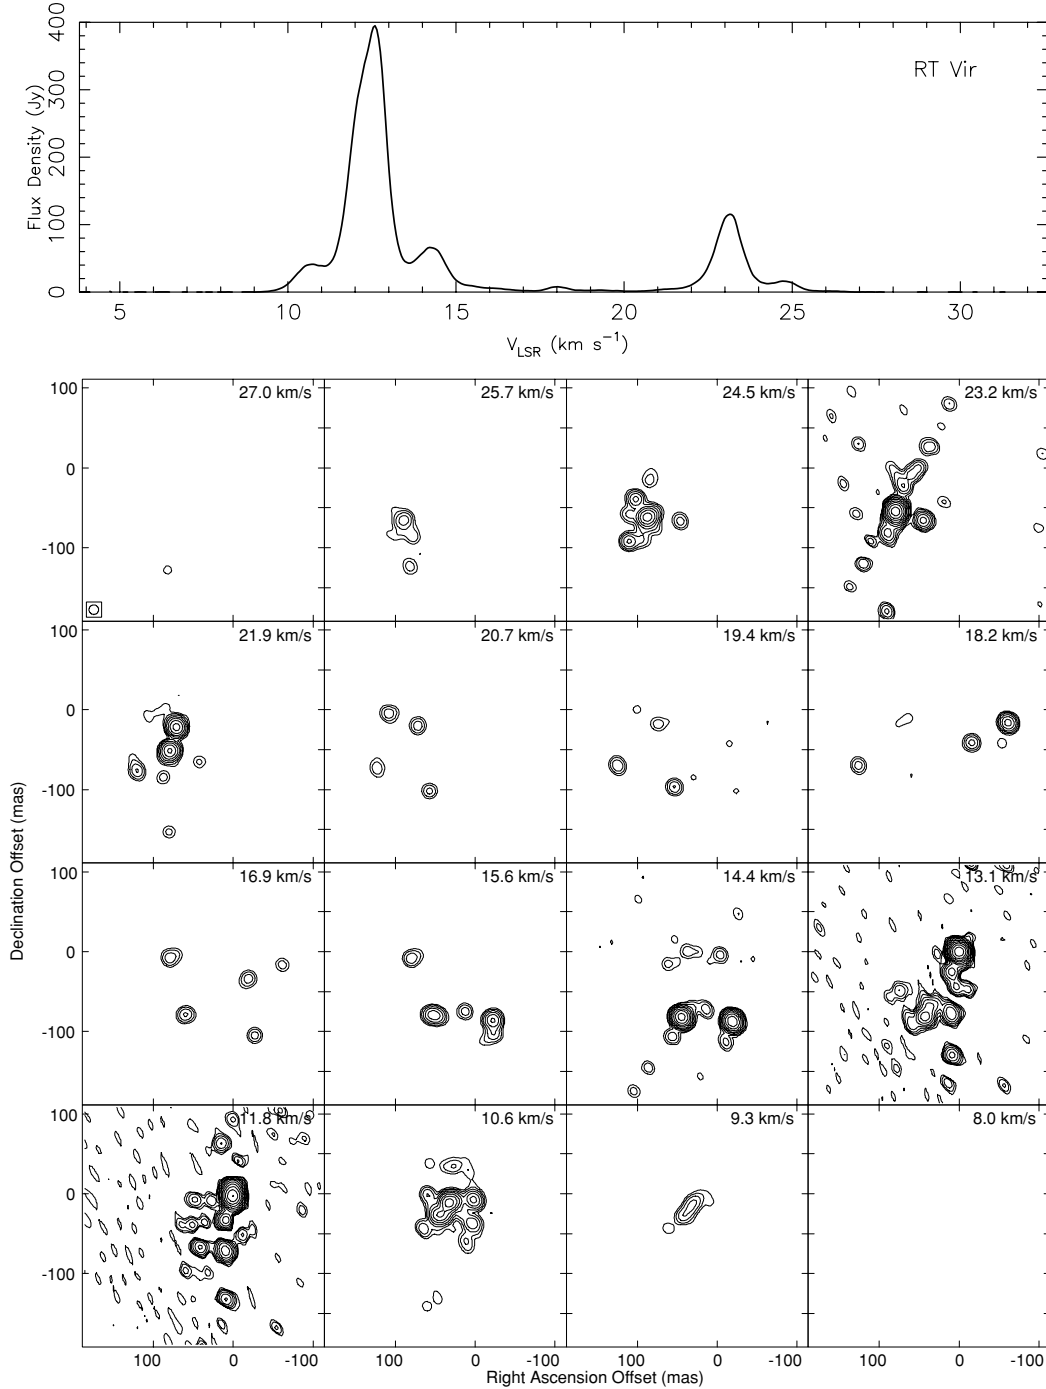

**Figure 4.** Top: MERLIN spectrum of RT Vir 22-GHz emission. Bottom: maps of emission integrated every 12 channels. The origin is at the position of the reference feature. Each panel is labelled with the central velocity. The contour levels are  $(1, 2, 4, \dots) \times 0.07 \text{ Jy beam}^{-1}$ . The restoring beam is shown in the first panel. The panels containing the brightest emission (at 23.2, 13.1 and  $11.8 \text{ km s}^{-1}$ ) contain some artefacts arising from dynamic range limitations.

extreme redshifted emission is to the south-east. The most extended emission consists of faint patches to the north (slightly blueshifted) and to the south (slightly red- and blueshifted).

The integrated emission shown in Fig. 1 gives the impression of a well-filled spherically symmetrical shell, but in fact there is a systematic displacement between the near and far sides of the envelope, with most redshifted masers to the east and blueshifted masers to the west (Fig. 6). This east–west velocity segregation can

be explained if the shell has an equatorial density enhancement so that the brightest masers lie in an oblate spheroid.

Previous maps of RT Vir show a similar displacement between the near and far sides of the  $\text{H}_2\text{O}$  envelope (Bowers et al. 1993; Bowers & Johnston 1994; Yates & Cohen 1994; Imai et al. 1997a). Despite this similarity, individual maser features cannot be matched.

RT Vir has been monitored at 22 GHz at Pushchino since 1985 (Mendoza-Torres et al. 1997; Lekht et al. 1999). It is extremely

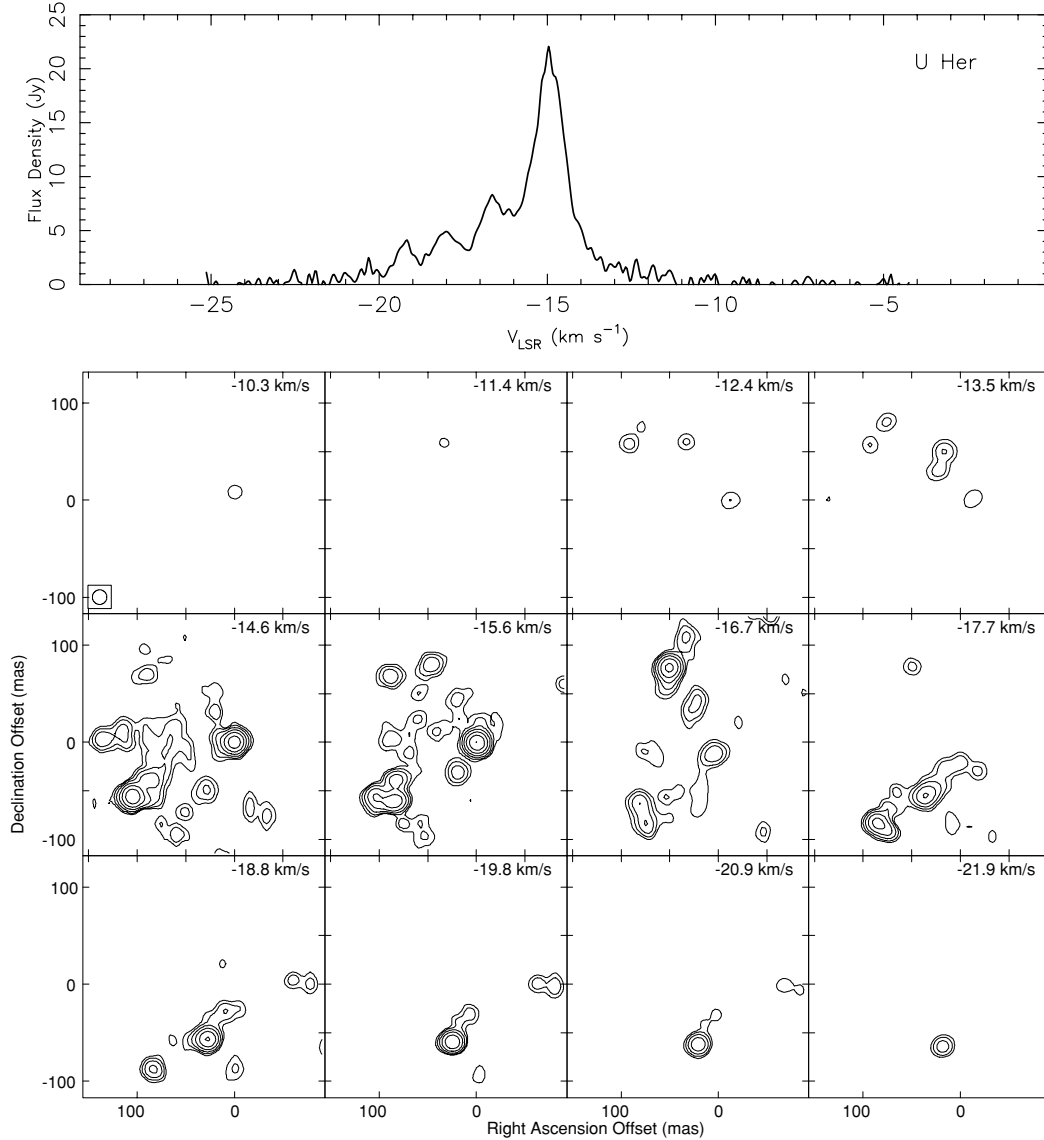

**Figure 5.** Top: MERLIN spectrum of U Her 22-GHz emission. Bottom: maps of emission integrated every 10 channels. The origin is at the position of the reference feature. Each panel is labelled with the central velocity. The contour levels are  $(1, 2, 4, \dots) \times 0.07 \text{ Jy beam}^{-1}$ . The restoring beam is shown in the first panel. The panels containing the brightest emission (at  $-14.6$ ,  $-15.6$  and  $-16.7 \text{ km s}^{-1}$ ) contain some artefacts, mostly near the centre, arising from dynamic range limitations.

rapidly variable, with individual flares lasting less than 3 months. The MERLIN spectrum has a peak 150 Jy brighter than measured at Pushchino a month earlier.

RT Vir appears to have an equatorial density enhancement in its 22-GHz maser distribution, such that the brightest emission comes from an oblate spheroid tilted in the plane of the sky so that the western side is approaching us. This structure persists much longer than the lifetime of identifiable individual maser clouds. The model maps of Bowers (1991) (fig. 2) qualitatively illustrate the appearance of the brightest emission (as for IK Tau). The polar axis is likely to be at a projected angle similar to the direction of the red–blue velocity offset.

### 3.5 U Her

The emission from U Her is strongest near the stellar velocity and mainly blueshifted. The emission comes from an elliptical ring-

like region centred on our estimated stellar position, and elongated roughly north–south. The brightest emission lies to the south and west. The emission from each channel map is likewise ring-like, with no systematic change of radius with velocity. The most complete rings are seen near the stellar velocity, whereas at the extreme velocities just a single emission region is seen, offset from the stellar position by  $\sim 80 \text{ mas}$  in each case. The most redshifted emission occurs near the inner edge of the ring towards the west. The extreme blueshifted emission lies to the south-south-west. The only emission clearly outside the ring is a moderately blueshifted spur  $\sim 100 \text{ mas}$  to the west.

A similar ring-like distribution was observed by Bowers & Johnston (1994) in 1988 with the VLA, when the source was an order of magnitude brighter. However, there is no detailed correspondence of individual maser features between the two epochs. The extreme blueshifted emission which formed the north-eastern part of the ring in 1988 has now faded. The radius of the ring may



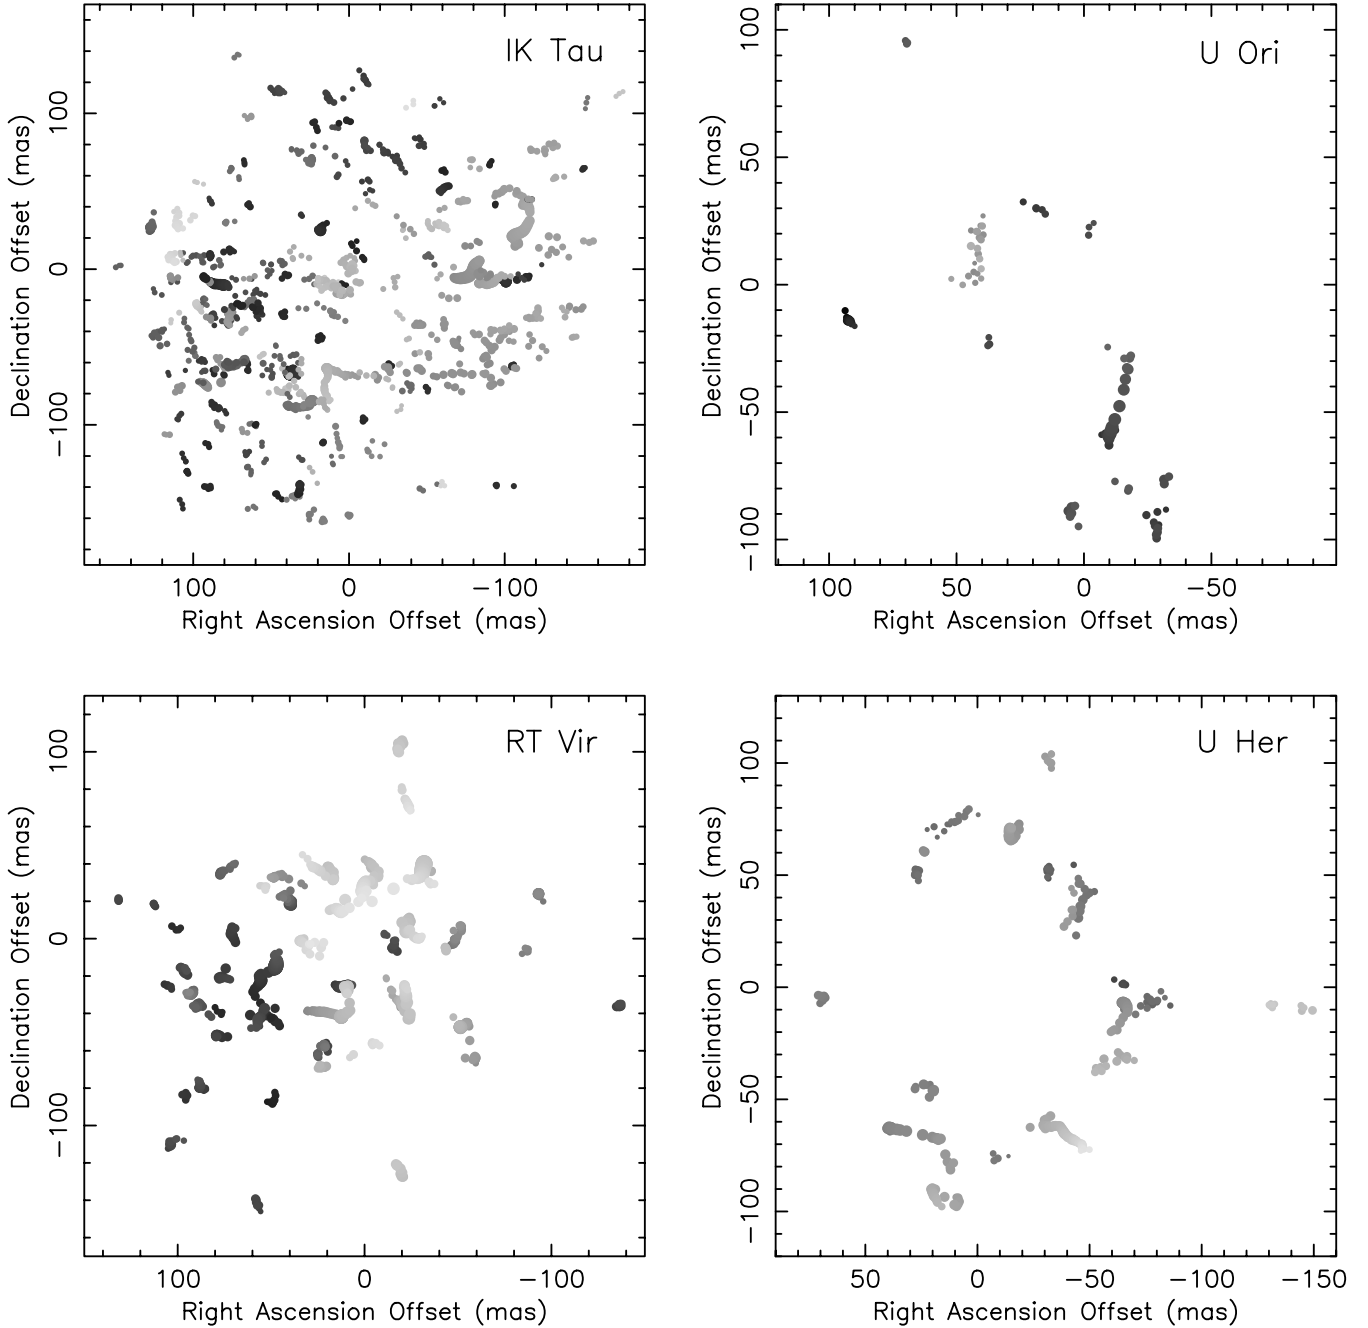

**Figure 6.** The positions of the  $\text{H}_2\text{O}$  maser components for each source. Each panel is labelled with the source name. The origin is at the estimated stellar position. The diameter of each spot is proportional to the logarithm of its flux density. The paler spots correspond to more blueshifted emission and the darker spots correspond to more redshifted emission.

appear to have increased by  $\sim 20$  mas in the 5 years between the two set of observations, but this result is only marginally significant given the 70-mas beam of the VLA and the lack of detailed agreement at the level of individual components. Colomer et al. (2000) also found a ring distribution using the VLA in 1990, but again with no detailed correspondence between individual maser features at the different epochs.

Previous MERLIN measurements by Yates & Cohen (1994) in 1985 detected only a single extended region of emission near the stellar velocity.

The strong differences in appearance at different epochs show that individual clouds in the envelope of U Her cannot be followed for

more than  $\sim 2$  stellar periods. This is consistent with the shock model discussed later in Section 5.4. U Her, like U Ori, has also undergone OH maser flares (Etoka & Le Squeren 1997), which may be another result of shocks.

## 4 THE DYNAMICS OF THE CIRCUMSTELLAR ENVELOPES

### 4.1 Stellar position

Much of our further analysis requires an estimate of the stellar position. We used two methods to estimate the centre of expansion

**Table 4.** Estimated stellar positions ( $X$ ,  $Y$ ) with respect to the reference feature for each source.

| Source | ( $X$ , $Y$ )<br>(mas) | Error in $X$ and $Y$<br>(mas) |
|--------|------------------------|-------------------------------|
| IK Tau | (−38, 67)              | 4                             |
| U Ori  | (11, 57)               | 9                             |
| RT Vir | (32, −40)              | 3                             |
| U Her  | (65, 7)                | 5                             |

( $X$ ,  $Y$ ), assumed to be the stellar position. Both methods assume that  $V_*$  is accurately known and use least-squares minimization routines.

The shell-fitting method of Yates (1993) finds the point that is most nearly equidistant from all components in angular separation and in velocity. This assumes that the maser components have a point-symmetric distribution about the centre of a spherical shell. However, for non-spherical shells it is more reliable to use a method based on the quenching radius (Section 5.3). Values of ( $X$ ,  $Y$ ) are found that maximize the angular separation from all components with velocities within the range  $V_* \pm (\Delta V_{\text{LSR}}/n)$ , where  $n$  is between 4 and 8 (see Table 3).

In practice, similar results were obtained using both methods for IK Tau, RT Vir and U Her. For U Ori the shell-fitting method did not converge, but the quenching radius method gave consistent results for different values of  $n$ . Table 4 gives ( $X$ ,  $Y$ ) found by the quenching radius method. The error quoted is the difference between this position and the mean position found by all methods.

Figs 2 to 5 (bottom) show that in all four CSEs either or both of the extreme blue- and redshifted features are offset from the assumed stellar position by 20–115 mas. We did not consider the mid-point of the extreme blue- and redshifted features as the stellar position, as in every case this would be very asymmetric with respect to most of the masers. The offsets could be explained by turbulence of 1.1–1.6 km s<sup>−1</sup> (Chapman et al. 1994; Chapman 1985), by clumpiness, or by more systematic causes discussed in Sections 3.1 and 5.4.

#### 4.2 Kinematics of the H<sub>2</sub>O shells

Previous MERLIN observations of circumstellar H<sub>2</sub>O masers have suggested a thick-shell model, in which the masers are distributed irregularly but the velocity field is regular and spherically symmetric, increasing steadily with radius through the H<sub>2</sub>O maser region (Yates & Cohen 1994; Richards et al. 1999, and references therein). That model also describes the present observations well. In Fig. 7 we show the radius–velocity plots for the four sources. The inner and outer edges of the H<sub>2</sub>O envelope were estimated by fitting the dashed ellipses by eye to the data. From these we obtain the inner and outer radii of the H<sub>2</sub>O maser zone, which we denote by  $r_i$  and  $r_o$ , together with the corresponding expansion velocities  $v_i$  and  $v_o$ . These parameters are listed in columns (2)–(7) of Table 5. The error in the estimated stellar position (Section 4.1) is applicable to the estimates of  $r_i$  and  $r_o$  and is given in column (8) of the table.

Two alternative inner limits are shown for IK Tau, since the limit (a) with the larger value of  $r_i$  is well defined but a few features lie within this, giving a smaller value (b). The limits for U Ori and U Her are more uncertain but have been informed by the appearance of these stars at other epochs (e.g. Bowers & Johnston 1994; Murakawa, private communication) when emission appeared at different position angles and/or velocities.

In all cases the expansion velocity is less than the escape velocity at the inner edge of the H<sub>2</sub>O maser zone, but easily exceeds the escape velocity at the outer edge of the H<sub>2</sub>O maser envelope. This

was already established by Yates & Cohen (1994) for IK Tau and RT Vir, and seems to be a characteristic of circumstellar H<sub>2</sub>O envelopes in general.

The shell limits were used to derive the logarithmic velocity gradient  $\epsilon = d(\ln v)/d(\ln r)$  in each circumstellar envelope. These are listed in column (9) of Table 5, along with the error  $\sigma_\epsilon$ , the linear velocity gradient  $K_v$  and its uncertainty  $\sigma_{K_v}$  [in columns (10) to (12) respectively]. These are average values for the H<sub>2</sub>O maser shells as there are local variations in each CSE. Acceleration is strongest nearer the star in each case.

The values of  $\epsilon$  are similar in the four stars: they range from 0.5 to 0.9, and are very similar to the values derived from MERLIN observations of supergiants (Yates & Cohen 1994, and references therein). These are the first direct measurements of  $\epsilon$  for low-mass AGB stars, since ours are the first measurements to resolve the thickness of the H<sub>2</sub>O shells. Previous MERLIN measurements by Yates & Cohen (1994) made at lower angular resolution (without the Cambridge telescope) could only set upper limits on  $\epsilon$  for IK Tau and RT Vir.

The total H<sub>2</sub>O maser luminosity  $\Phi$  (equivalent isotropic luminosity) is given in column (13) of Table 5 for completeness. Although the three Miras all have peaks of similar intensity (Table 3) and are at a similar distance, U Ori has only about a quarter of the luminosity of IK Tau, U Her being at an intermediate value. RT Vir is almost twice as luminous as the brightest of the Miras.

The present measurements are sufficiently detailed to allow us to investigate the variation of maser emissivity with radius in the CSEs. Fig. 7 and the spectra in Figs 2–5 show that more and brighter masers were detected in the inner parts of the shells. This is broadly consistent with the models of Cooke & Elitzur (1985) who predict a sharp increase in maser brightness near  $r_i$  and a gradual decline towards  $r_o$ .

The 22-GHz maser shells around IK Tau and RT Vir are well-filled enough for us to estimate the photon luminosity as a function of distance from the star. We used the model of a spherically symmetric velocity field within the shell limits given in Table 5 to assign each maser component a full set of vectors to describe its position and velocity in all three spatial dimensions, as described in Murakawa et al. (2003). We then calculated the flux density in sub-shells with a cross-section in the plane of the sky of 10 mas, and used this to find the 22-GHz photon rate per unit radius  $d\Phi/dr$ . This is shown in Fig. 8. The results are robust at the 10 per cent level to departures from spherical symmetry by up to a factor of 2 in  $\epsilon$  (Richards et al. 1999).

The results shown in Fig. 8 were compared with the model results of Cooke & Elitzur (1985). Initially we used the mass-loss rates  $\dot{M}_{\text{CO}}$  given in Table 1. For IK Tau  $d\Phi/dr$  reaches a maximum value of  $\sim 2 \times 10^{33}$  photon s<sup>−1</sup> m<sup>−1</sup> at a radius of  $6 \times 10^{12}$  m. This distance is within the range predicted by the models of Cooke & Elitzur (1985) for the given  $\dot{M}_{\text{CO}}$ . However, for RT Vir, the maximum  $d\Phi/dr \sim 4 \times 10^{33}$  photon s<sup>−1</sup> m<sup>−1</sup> occurs at a radius of  $3 \times 10^{12}$  m, which is  $\sim 3$  times the radius predicted by Cooke & Elitzur (1985) for the given  $\dot{M}_{\text{CO}}$ .

We return to this comparison later in Section 5.4, when we discuss the overdensity of the H<sub>2</sub>O maser clouds with respect to their surroundings.

#### 4.3 The velocity fields of the stellar winds

Fig. 9 shows plots of expansion velocity versus radial distance for the four stars, compiled using our H<sub>2</sub>O data together with data on other molecular species taken from the literature. All four stars

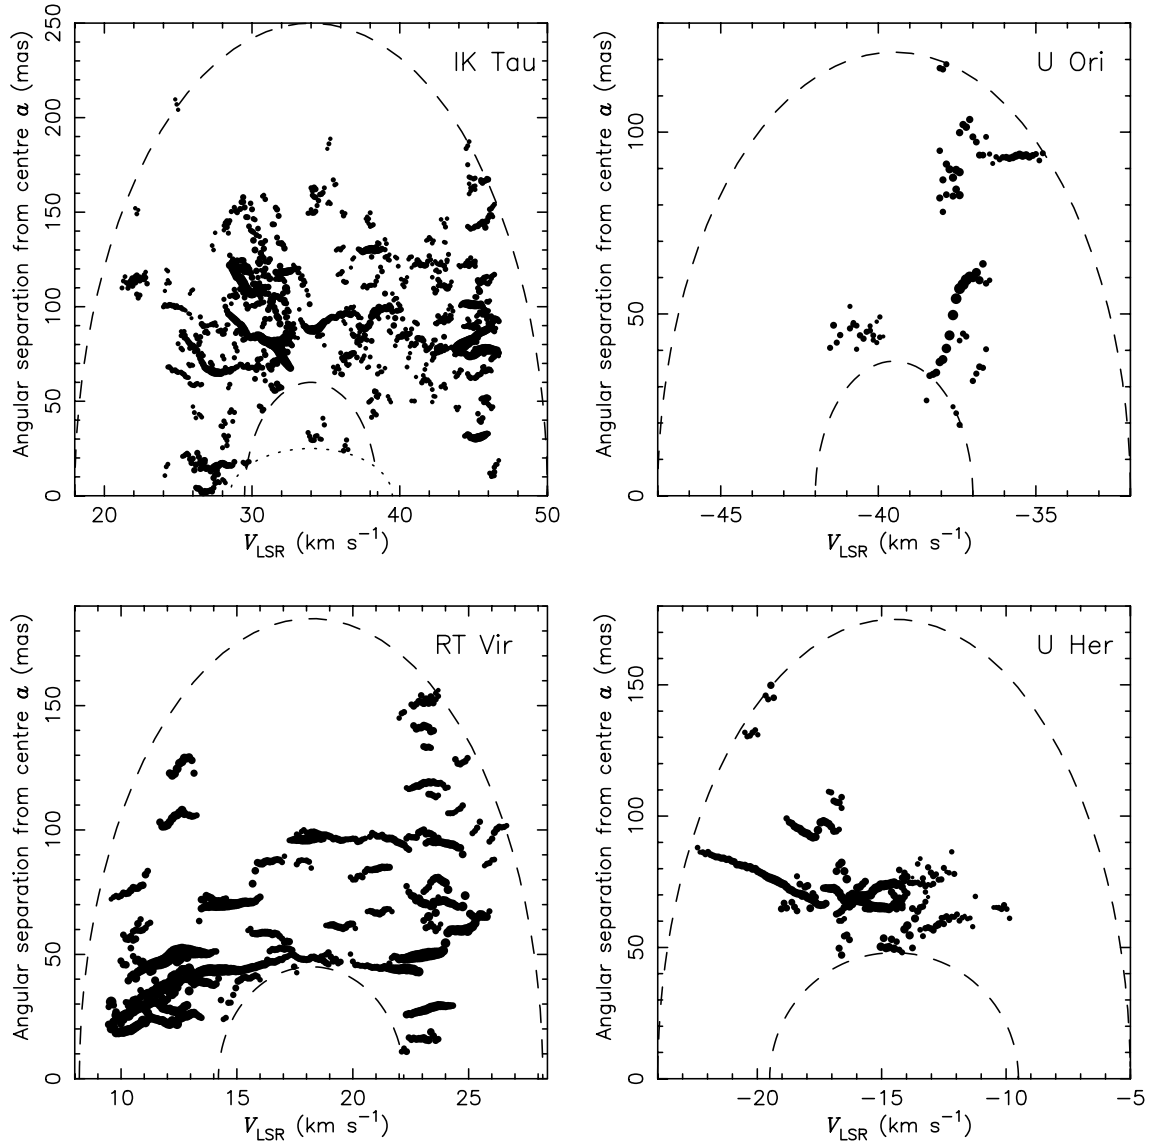

**Figure 7.** Radius–velocity plots of the 22-GHz masers around IK Tau, U Ori, RT Vir and U Her, showing the angular separation  $a$  from the assumed stellar position, as a function of  $V_{\text{LSR}}$ . The diameter of each spot is shown proportional to the logarithm of its flux density. The dashed lines show ellipses centred on  $V_*$  which were fitted by eye to the inner and outer limits of the maser distribution. The dotted line shows an alternative inner limit for IK Tau (see Section 5.3).

**Table 5.** Parameters of the  $\text{H}_2\text{O}$  maser envelopes (see Sections 4.2 and 4.3 for details).

| Source    | $r_i$<br>(mas) | $r_i$<br>(au) | $v_i$<br>( $\text{km s}^{-1}$ ) | $r_o$<br>(mas) | $r_o$<br>(au) | $v_o$<br>( $\text{km s}^{-1}$ ) | $\sigma_r$<br>(au) | $\epsilon$ | $\sigma_\epsilon$ | $K_v$<br>( $10^{-12} \text{ km s}^{-1} \text{ m}^{-1}$ ) | $\sigma_{K_v}$<br>( $10^{-12} \text{ km s}^{-1} \text{ m}^{-1}$ ) | $\Phi$<br>( $10^{42} \text{ photon s}^{-1}$ ) |
|-----------|----------------|---------------|---------------------------------|----------------|---------------|---------------------------------|--------------------|------------|-------------------|----------------------------------------------------------|-------------------------------------------------------------------|-----------------------------------------------|
| (1)       | (2)            | (3)           | (4)                             | (5)            | (6)           | (7)                             | (8)                | (9)        | (10)              | (11)                                                     | (12)                                                              | (13)                                          |
| IK Tau(a) | 60             | 16.0          | 4.5                             | 250            | 66.5          | 16.0                            | 1.0                | 0.89       | 0.08              | 1.52                                                     | 0.06                                                              | 4.63                                          |
| IK Tau(b) | 25             | 6.7           | 5.5                             | 250            | 66.5          | 16.0                            | 1.0                | 0.46       | 0.09              | 1.17                                                     | 0.04                                                              | 4.63                                          |
| U Ori     | 37             | 9.8           | 2.5                             | 120            | 32.5          | 7.5                             | 2.4                | 0.92       | 0.24              | 1.48                                                     | 0.23                                                              | 0.85                                          |
| RT Vir    | 45             | 6.0           | 4.0                             | 185            | 25.6          | 10.0                            | 0.4                | 0.65       | 0.05              | 2.15                                                     | 0.08                                                              | 7.88                                          |
| U Her     | 48             | 12.8          | 5.0                             | 175            | 46.6          | 9.5                             | 1.1                | 0.50       | 0.04              | 0.89                                                     | 0.05                                                              | 1.92                                          |

have bright OH mainline masers which have been mapped (Kirrane 1987; Bowers & Johnston 1988; Chapman, Cohen & Saikia 1991; Chapman et al. 1994; Richards et al. 2000), while IK Tau was mapped at 1612 MHz by Kirrane (1987). The OH 1612-MHz maser flares in U Ori were imaged by Chapman & Cohen (1985), but as there was no clear shell structure there was no obvious way to assign a radial distance to the emission. CO data were taken from the

references in Table 1. Only RT Vir is well resolved in CO (Stanek et al. 1995). The values given for the Miras are based on different models used by the various authors, but they also observed some of the same stars as Stanek et al. (1995). Comparison of the results for objects in common suggests a CO diameter of 10 000 au for IK Tau, and sizes a factor of 3–5 smaller than those given for U Her and U Ori. The error bars for CO data in Fig. 9 reflect this. The

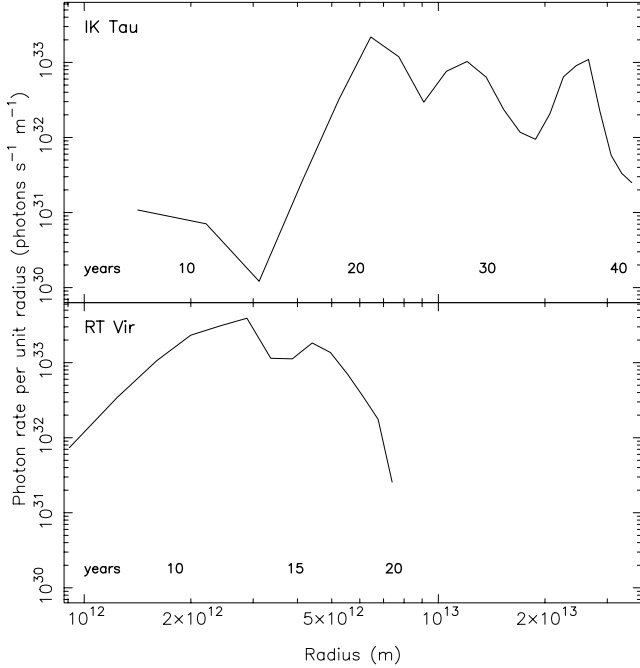

**Figure 8.** The 22-GHz photon rate per unit radius for IK Tau and RT Vir, as a function of radial distance from the assumed stellar position. The bold numbers above the abscissa are estimates of the time taken for material in the stellar wind to reach that distance: see Section 5.3.

distances were taken as 133 pc for RT Vir and 266 pc for the other stars.

Fig. 9 show several striking features.

(i) There is a general increase of expansion velocity with distance from the star, with some scatter. The strongest acceleration is in the region out to 30 au in the smallest CSE, RT Vir, and 70 au in the largest, IK Tau.

(ii) IK Tau and U Her also show evidence for gentler acceleration continuing further outwards to  $\sim 500$  au, and perhaps as far as the CO region at  $\sim 3000$  au.

(iii) The best filled 22-GHz maser shells, around IK Tau and RT Vir, attain the greatest H<sub>2</sub>O velocities and contain faster emission at a given radius than do the shells of U Ori and U Her.

(iv) In U Ori, U Her and RT Vir, the OH mainline masers overlap the H<sub>2</sub>O shells in angular separations and velocities. However, the H<sub>2</sub>O masers appear to have greater velocities than OH masers at a similar radius.

Chapman & Cohen (1986) observed acceleration of the wind from VX Sgr out to at least  $100R_*$ , and showed that it could be explained by an increase in the dust absorption efficiency  $\kappa_D$  during the outflow. A similar kinematic pattern has been observed in other RSGs, e.g. S Per (Richards et al. 1999), but hitherto it has been hard to confirm similar behaviour in the smaller CSEs of Miras. Fig. 9 and Table 5 show that acceleration occurs out to many tens of  $R_*$  in these stars, and much further for two of the stars: IK Tau and U Her.

If dust properties are assumed to be constant, Elitzur & Ivezić (2001) predict that some acceleration does occur because of optical depth effects, but terminal velocity is attained at  $\lesssim 10R_*$  and wind speed increases monotonically with  $\dot{M}$  for silicate dust (Netzer & Elitzur 1993). Monnier, Geballe & Danchi (1998, 1999) found periodic and long-term fluctuations in the shape and intensity of the 9.7- $\mu$ m silicate feature towards IK Tau, U Ori and U Her. This sug-

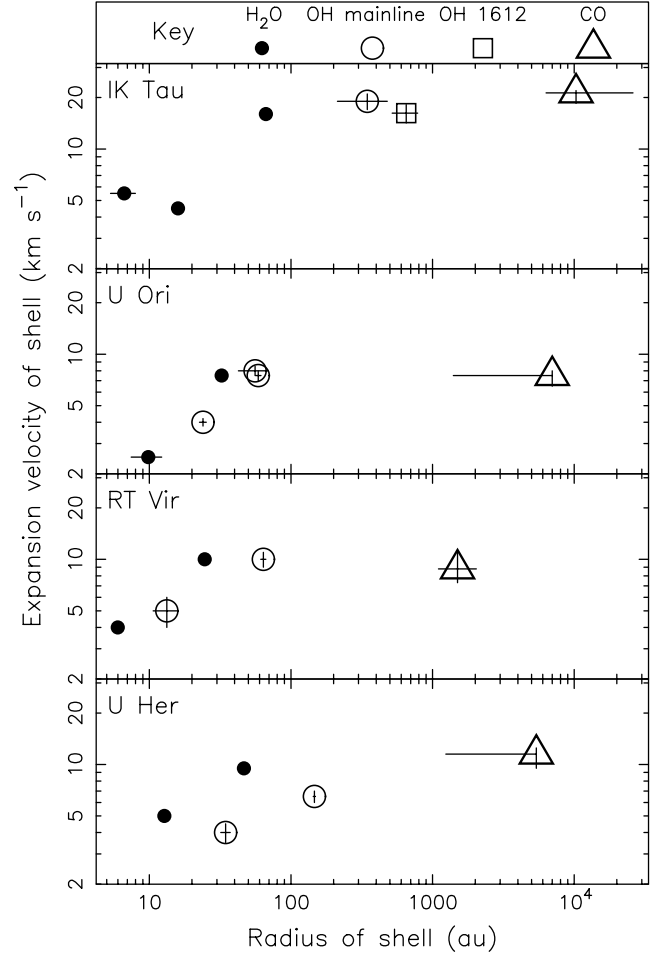

**Figure 9.** Expansion velocity as a function of radial distance from the four stars IK Tau, U Ori, RT Vir and U Her. The H<sub>2</sub>O data are from Table 5. The OH data are from references given in Section 4.3. The CO values are outer limits from references given in Table 1.

gests changes in the dust optical constants; possible mechanisms include annealing or solid diffusion (Gail & Sedlmayr 1999, and references therein), which could improve the absorption efficiency at greater  $r$ .

Multi-epoch monitoring is continuing to investigate the effects of stellar variability on the velocity field in CSEs. Engels et al. (1997) found strong variability (‘mode-switching’) in the 22-GHz line shape and velocity width towards OH 39.7+1.5, with no evidence for velocity gradients at large radial distances. However, unlike the stars in our sample, this object has cool *IRAS* colours and a 9.7- $\mu$ m silicate feature in absorption. Engels, Schmid-Burgk & Walmsley (1988) and Szymczak & Engels (1995) also found that H<sub>2</sub>O masers attain terminal velocity in objects with high  $\dot{M}$ , whereas H<sub>2</sub>O masers in thinner shelled CSEs do not. This is consistent with our results and suggests that stronger acceleration is favoured when starlight can more easily penetrate the CSE.

## 5 THE PROPERTIES OF MASER CLOUDS

### 5.1 Maser component sizes and temperatures

We now analyse the properties of individual water vapour maser clouds. We begin by considering the Gaussian components fitted to each channel map. In the following sections we will deal with

**Table 6.** The error-weighted statistics of maser components and their brightness temperatures: see text for details.

| Source | $N_c$ | $F_c$ | $\bar{s}$<br>(mas) | $\sigma_{\bar{s}}$<br>(mas) | Max. $T_{Bc}$<br>(K) | $\alpha$ |
|--------|-------|-------|--------------------|-----------------------------|----------------------|----------|
| (1)    | (2)   | (3)   | (4)                | (5)                         | (6)                  | (7)      |
| IK Tau | 1490  | 0.60  | 3                  | 2                           | $5 \times 10^9$      | -4       |
| U Ori  | 95    | 0.82  | 9                  | 3                           | $2 \times 10^8$      | +7       |
| RT Vir | 847   | 0.73  | 6                  | 2                           | $1 \times 10^{11}$   | -2       |
| U Her  | 282   | 0.55  | 3                  | 2                           | $1 \times 10^8$      | -3       |

the maser clouds themselves. Fig. 6 shows the positions of the fitted components in each channel relative to the estimated stellar position (Section 4.1) for each source. A complete list of the fitted components and their parameters is available from the authors on request.

In each source, the majority of components are resolved. Table 6 summarizes component properties. The apparent size of an individual maser component  $s$  (measured as described in Section 2) is the FWHM of beamed maser emission from molecules with velocities within the  $0.105 \text{ km s}^{-1}$  channel width, and is smaller than the physical size of the emitting region. The greater the maser amplification factor, the smaller the beaming angle (Elitzur 1992), and so under comparable conditions brighter maser components appear smaller. Column (2) gives the total number  $N_c$  of 22-GHz maser components in each source and column (3) gives the fraction of components  $F_c$  for which  $s > \sigma_s$ , where  $\sigma_s$  is the uncertainty in  $s$ . The error-weighted mean and scatter of  $s$ ,  $\bar{s}$  and  $\sigma_{\bar{s}}$ , are given in columns (4) and (5). The scatter is intrinsic to the data, not simply due to measurement uncertainties. Note that if RT Vir is at half the distance of the other sources,  $\bar{s}$  represents a similar actual size in all sources apart from U Ori, the components of which appear significantly larger. Imai et al. (1997b) resolved out well over half the flux from RT Vir using very long baseline interferometry (VLBI), but established that the brighter spots detected (mostly  $>100 \text{ Jy}$  in the total power spectrum) had a spatial FWHM of 0.3–1.2 mas, which is consistent with our results.

The brightness temperature  $T_{Bc}$  of each component was calculated from its total flux density  $S_c$  and its size  $s$ . The minimum  $T_{Bc}$  measured for each source was  $10^5 \text{ K}$ ; the maxima are given in column (6) of Table 6. For a spherical masing region, the relationship between beamed component size and brightness temperature can be approximated by

$$s \propto \alpha \log T_{Bc}. \quad (1)$$

Elitzur (1992) develops a more complete model giving  $-1 \lesssim \alpha \lesssim -2$  for spherical clouds, explaining how lower values correspond to more saturated maser emission if the other relevant factors are unchanged.

Fig. 10 shows  $s$  as a function of  $\log T_{Bc}$ . We used error-weighted least-squares fits to find the slope  $\alpha$ , which is given in column (7) of Table 6. For IK Tau, U Her and RT Vir, the results are broadly consistent with our simplified model and imply that the masers are saturated. The formal errors in  $\alpha$  are  $\leq 0.2$  and values of  $\alpha < -2$  may be due to the intrinsic scatter in  $s$  and to deviations from our assumptions. However, for U Ori  $\alpha > 0$ , showing that more drastic revision is needed, and this is discussed in Section 5.4.

## 5.2 Measurements of maser clouds

Fig. 6 shows the grouping of components into necklace-like strings, with similar velocities and positions. Each string is thought to be produced by a single maser cloud, with the emission in each fre-

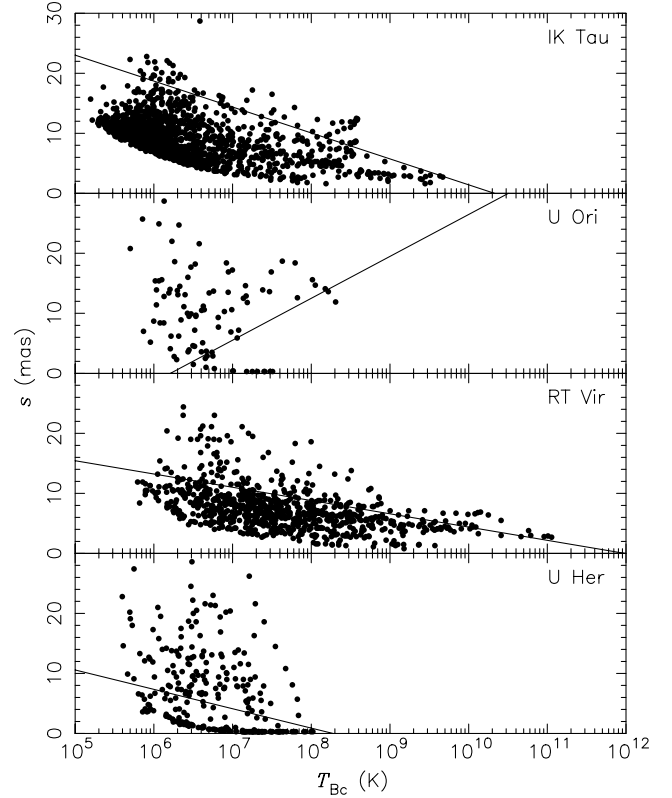**Figure 10.** Maser component FWHM  $s$  as a function of brightness temperature  $T_{Bc}$ . The lines show error-weighted fits with slope  $\alpha$  as defined in equation (1).

quency channel picking out the line of greatest amplification within the velocity range of that channel. IK Tau contains a few clouds with distinct velocity–position gradients, but most have an apparently random distribution of components with velocity. In U Ori, only two clouds have any clear structure. However, in U Her much of the blueshifted emission is less random and in RT Vir the majority of clouds have smooth (not necessarily linear) gradients, which are also seen in Fig. 7.

The measurements of each maser cloud derived from its constituent components are given in the appendix. Columns (1) and (2) give the flux-weighted mean  $V_{LSR}$  of the cloud ( $\overline{V_{LSR}}$ ) and its total velocity width ( $\Delta V$ ). Columns (3) and (4) respectively give the FWHM ( $\Delta V_{1/2}$ ) of a Gaussian curve fitted to the cloud velocity profile and the uncertainty in this ( $\sigma_{\Delta V_{1/2}}$ ). Columns (5)–(12) give the position of the error-weighted centroid of the cloud with respect to the assumed stellar position (Section 4.1):  $x$ ,  $\sigma_x$ ,  $y$  and  $\sigma_y$  are the offsets and uncertainties in Cartesian coordinates and  $a$ ,  $\sigma_a$ ,  $\theta$  and  $\sigma_\theta$  are in polar coordinates. Columns (13) and (14) respectively give the total angular extent of the cloud ( $L$ ) and its uncertainty ( $\sigma_L$ ); column (15) gives the peak flux density ( $I$ ), column (16) gives the total flux in the cloud ( $S$ ) and column (17) gives the peak brightness temperature ( $T_B$ ).

Using a distance of 133 pc for RT Vir and 266 pc for the other sources, cloud angular size  $L$  was converted to the cloud diameter  $l$ , which is likely to represent at least 85 per cent of the true unbeamed size (Richards et al. 1999).

Figs 11 and 12 show the distribution of  $l$ ,  $\Delta V_{1/2}$  and  $\Delta V$  for each source. Individual cloud measurements of accuracy  $\leq 1.5\sigma$  (mostly for clouds comprising only three components) are not included. Table 7 gives the properties of an average cloud around each star

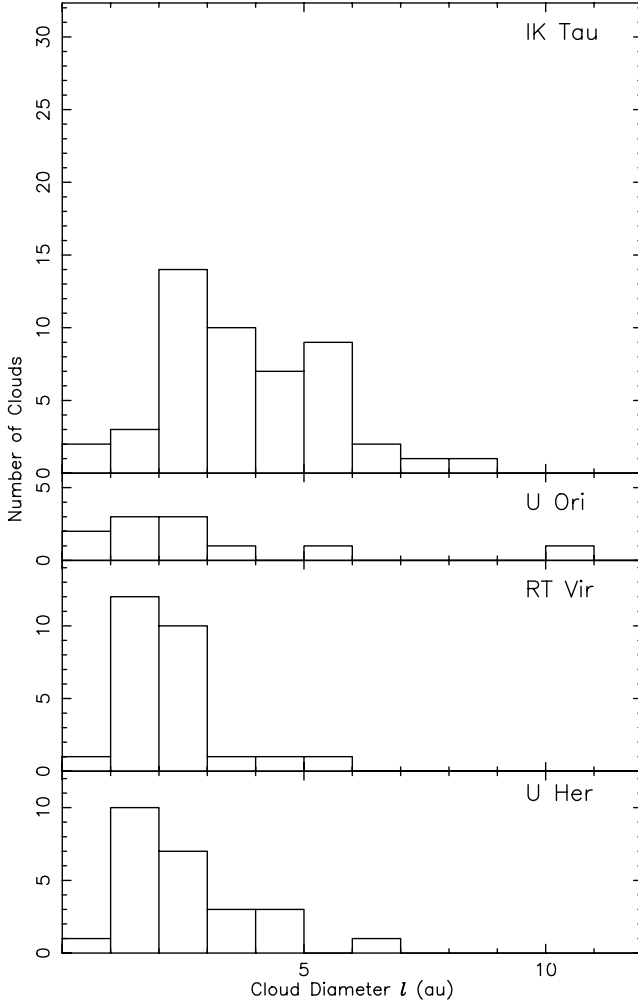

**Figure 11.** The distribution of diameters  $l$  of maser clouds in each source, for clouds with  $l > 1.5\sigma_l$ .

derived from error-weighted means of the individual cloud measurements above the threshold of  $1.5\sigma$ . Column (2) gives the total number  $N$  of clouds in the source. Column (3) gives the number of clouds  $N(l, 1.5)$  with  $l/\sigma_l > 1.5$ , where  $\sigma_l$  is the uncertainty in  $l$ . The mean ( $\bar{l}$ ) and dispersion ( $\sigma_l$ ) of their diameters are given in columns (4) and (5) respectively. Columns (6) gives the number of clouds  $N(\Delta V_{1/2} > 1.5\sigma_{\Delta V_{1/2}})$ . These were used to find the mean ( $\overline{\Delta V_{1/2}}$ ) and dispersion ( $\sigma_{\Delta V_{1/2}}$ ) of the velocity FWHM and of the total velocity width ( $\overline{\Delta V}$ ) and the uncertainty in this ( $\sigma_{\Delta V}$ ), given in columns (7)–(10).

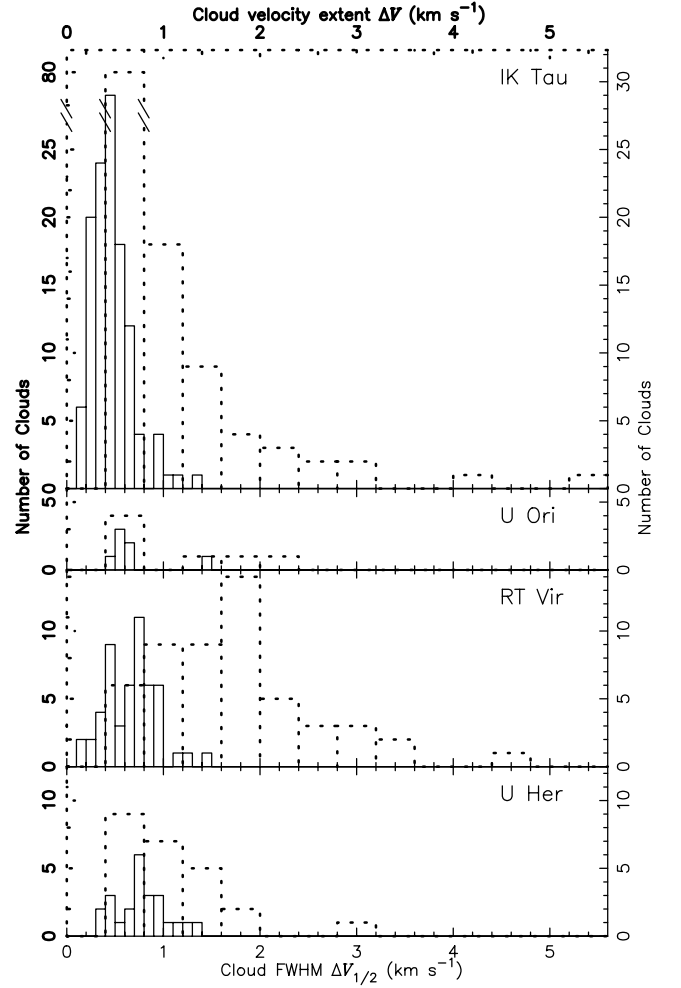

**Figure 12.** The distribution of the total velocity extent  $\Delta V$  (dotted lines) and FWHM  $\Delta V_{1/2}$  (solid lines) of maser clouds in each source for clouds with  $\Delta V_{1/2} > 1.5\sigma_{\Delta V_{1/2}}$ .

Table 7 shows that the clouds around IK Tau have a significantly larger  $\bar{l}$  and a smaller  $\overline{\Delta V}$  than those around RT Vir. U Ori and U Her have intermediate values. The IK Tau clouds also have the smallest  $\overline{\Delta V_{1/2}}$ . Fig. 11 shows that IK Tau contains a greater number of larger clouds than the other sources. Fig. 12 shows that RT Vir and U Her have more clouds with  $\Delta V_{1/2} > 0.7 \text{ km s}^{-1}$  than the other sources, although RT Vir has almost as many with  $0.4 < \Delta V_{1/2} < 0.5 \text{ km s}^{-1}$ , which is the peak range for IK Tau. The peak of the distribution of  $\Delta V$  is at  $1.6\text{--}2.0 \text{ km s}^{-1}$  for RT Vir, three times the value for the other sources. RT Vir and IK Tau have a few clouds with  $\Delta V$

**Table 7.** The average properties of clouds around each source. See Section 5.2 for details.

| Source | $N$ | $N(l1.5)$ | $\bar{l}$ | $\sigma_l$ | $N(\Delta V_{1/2} > 1.5\sigma_{\Delta V_{1/2}})$ | $\overline{\Delta V_{1/2}}$ | $\sigma_{\Delta V_{1/2}}$ | $\overline{\Delta V}$ | $\sigma_{\Delta V}$ | $N(u')$ | $\bar{u}'$                                              | Max. $u'$ |
|--------|-----|-----------|-----------|------------|--------------------------------------------------|-----------------------------|---------------------------|-----------------------|---------------------|---------|---------------------------------------------------------|-----------|
| (1)    | (2) | (3)       | (4)       | (5)        | (6)                                              | (7)                         | (8)                       | (9)                   | (10)                | (11)    | (12)                                                    | (13)      |
|        |     |           | (au)      |            |                                                  | (km s <sup>-1</sup> )       |                           | (km s <sup>-1</sup> ) |                     |         | (10 <sup>-12</sup> km s <sup>-1</sup> m <sup>-1</sup> ) |           |
| IK Tau | 256 | 49        | 3.8       | 0.2        | 120                                              | 0.46                        | 0.02                      | 0.84                  | 0.06                | 31      | 11                                                      | 68        |
| U Ori  | 14  | 10        | 3.0       | 0.8        | 7                                                | 0.68                        | 0.12                      | 1.07                  | 0.24                | 3       | 17                                                      | 45        |
| RT Vir | 55  | 26        | 2.2       | 0.2        | 52                                               | 0.67                        | 0.04                      | 1.67                  | 0.11                | 18      | 43                                                      | 190       |
| U Her  | 34  | 24        | 2.6       | 0.3        | 24                                               | 0.78                        | 0.05                      | 1.03                  | 0.12                | 9       | 11                                                      | 23        |

$\approx 3\Delta V_{\text{th}}$  where  $\Delta V_{\text{th}}$  is the thermal linewidth of  $\text{H}_2\text{O}$  at 1000 K,  $\sim 1.4 \text{ km s}^{-1}$ .

The necklace-like series of components in Fig. 6 appear to be in random directions. We searched for systematic velocity gradients within maser clouds as follows. For each cloud we attempted to fit a straight line to  $u = V_{\text{LSR}} - V_*$  as a function of position to find the gradient  $u'$ , taking the goodness of fit as well as measurement errors into consideration in finding the uncertainty  $\sigma_{u'}$ . Columns (11), (12) and (13) of Table 7 give the number of clouds  $N(u')$  with  $u' > 2\sigma_{u'}$  used to find the mean ( $\bar{u}'$ ) and the maximum (Max.  $u'$ ) of  $u'$ . The minimum measurable  $\bar{u}'$  was  $3 \times 10^{-12} \text{ km s}^{-1} \text{ m}^{-1}$ . The typical velocity gradient  $u'$  was  $\sim 20 \times 10^{-12} \text{ km s}^{-1} \text{ m}^{-1}$ . This is at least an order of magnitude larger than the systematic velocity gradient  $K_v$  (Table 5) within each expanding  $\text{H}_2\text{O}$  envelope. The most likely cause of this is local turbulence, which could be thermal, as  $\Delta V$  is of the same order as  $\Delta V_{\text{th}}$ , or due to shocks or differential acceleration between regions of different density or dust:gas ratio (see Section 5.3).

RT Vir has the strongest velocity gradients, with  $\bar{u}'$  more than double the  $u'$  seen for the other stars.

We also decomposed  $u'$  into  $du/da$  and  $du/d\theta$ , but found no statistically significant preferred direction for the individual cloud velocity gradients.

Fig. 13 shows that the distribution of peak  $T_B$  for clouds around RT Vir reaches a maximum in a range 10 times hotter than for the other stars, as well as extending to values 100 times higher. For unsaturated masers,  $\Delta V_{1/2}$  narrows as the maser gets brighter and then rebroadens as the maser saturates (Elitzur 1992). Although Figs 12 and 13 suggest a correlation between greater  $\Delta V_{1/2}$  and  $T_B$ , there is no clear relationship within the cloud measurements for each source.

### 5.3 Cloud densities and survival

The inner radius  $r_i$  of 22-GHz  $\text{H}_2\text{O}$  maser emission is determined by the quenching number density  $n_q$ , above which the collision rate exceeds the radiative decay rate of the upper level of the maser transition. At 1200 K, for a fractional  $\text{H}_2\text{O}$  number density  $f = 4 \times 10^{-4} n_{\text{H}_2}$  (where  $n_{\text{H}_2}$  is the  $\text{H}_2$  number density),  $n_q = 5 \times 10^{15}$  (Yates, Field & Gray 1997). Cooke & Elitzur (1985) predicted that  $r_i \propto M^{2/3}/v_i$ . This relation is plotted in Fig. 14, using the relevant values given in Tables 1 and 5. Fig. 14 shows that the observed  $r_i$  of the four sources lie well above the inner radii inferred from  $\dot{M}_{\text{CO}}$ . This suggests the maser clouds are denser than average for a homogenous wind, as if they were produced by localized episodes of mass loss at a higher rate.

The required mass-loss rates ( $\dot{M}_{\text{H}_2\text{O}}$ , uncertainty  $\sigma_{\dot{M}_{\text{H}_2\text{O}}}$ ) are derived as described in Richards et al. (1999). These are given in columns (2) and (3) of Table 8. The CO mass-loss rates  $\dot{M}_{\text{CO}}$  are given in Table 1 and the ratio of the cloud density to the average density at a given radius is  $\dot{M}_{\text{H}_2\text{O}}/\dot{M}_{\text{CO}} = f_\rho$ , given in column (4) of Table 8. The quenching density also implies that all maser clouds at a given temperature have the same density, regardless of the mass-loss rate.  $\bar{l}$  is used to find the volume filling factor for the clouds  $f_v$  given in column (5) of Table 8.

We adopt  $r_p = r_i + (r_o - r_i)/4$  as a typical radius for the best-filled and brightest part of the shell, where the true cloud diameter is probably closest to the average measured cloud size  $\bar{l}$ . Following Richards et al. (1999), we estimated the cloud density at  $r_p$  by extrapolation from  $n_q$  and used this to find the typical mass of a cloud of diameter  $\bar{l}$ ,  $M_{\text{H}_2\text{O}}$ , given in column (6).

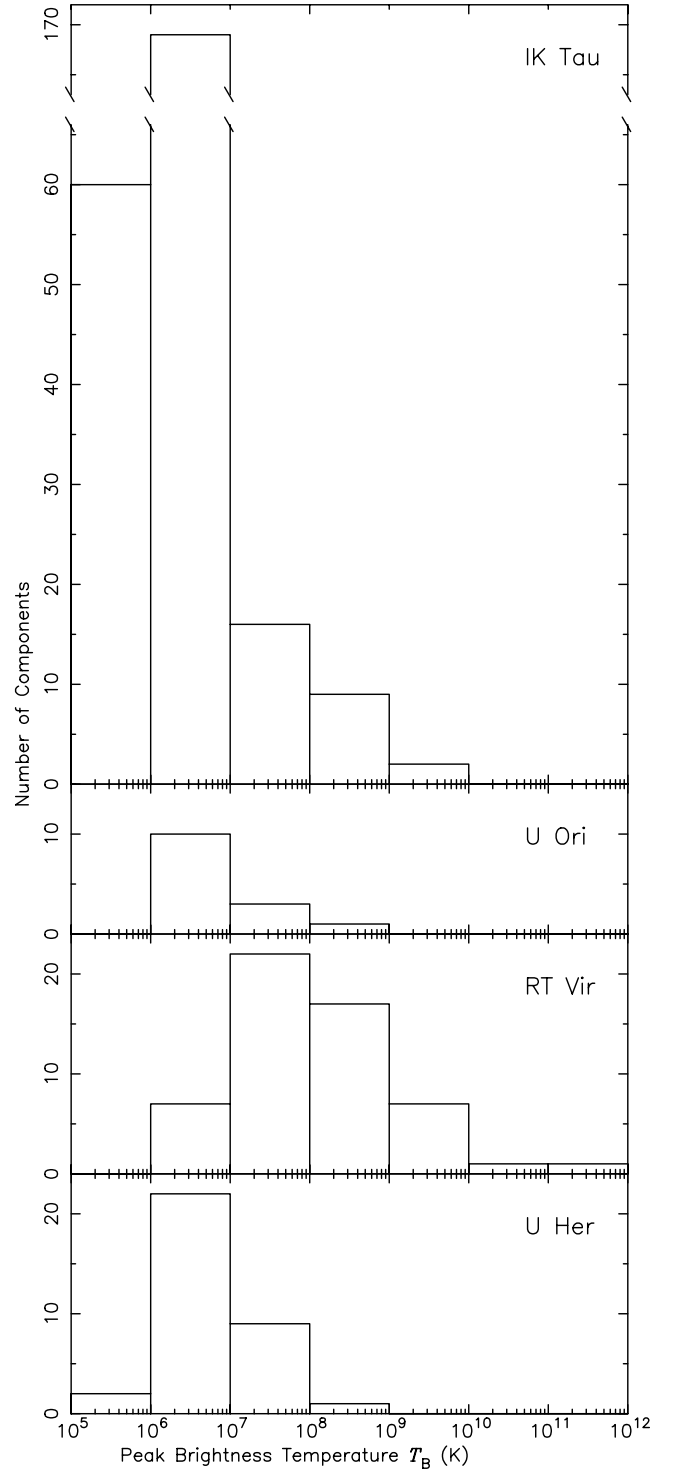

**Figure 13.** The distribution of the peak brightness temperatures of maser clouds in each source.

The cloud sound crossing time  $t_{\text{cs}}$  is given for  $\bar{l}$  in column (7). The time  $t_s$  taken for a cloud to travel from  $r_i$  to  $r_o$  is given in column (8) and used to find the apparent number of clouds formed per stellar period  $N_p$ , given in column (9). Fig. 8 shows the time since the clouds left the star as a function of radius, where the time at  $r_o$  is time taken to reach  $r_i$  (assuming a constant velocity of  $v_i$  from  $R_*$  to  $r_i$ ) plus  $t_s$ . IK Tau appears to form more clouds per period than

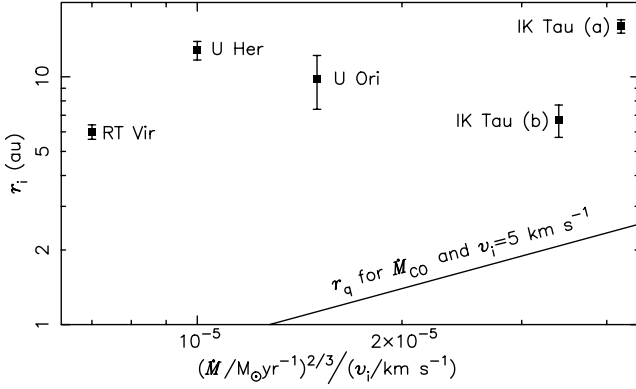

**Figure 14.** The labelled points show the measured values of  $r_i$  as a function of  $(\dot{M}_{\text{CO}})^{2/3}/v_i$ . The solid line is the predicted  $r_q$  for a similar range of  $\dot{M}_{\text{CO}}$  at a typical  $v_i = 5 \text{ km s}^{-1}$  and  $f = 4 \times 10^{-4}$ .

the other stars, although the value for RT Vir is uncertain because of its irregular period.

With  $t_{\text{cs}}$  of about 1.5–3 yr, all of the sources have  $t_{\text{cs}} \sim 1/10t_s$ , making them vulnerable to turbulent disruption. Indeed, observations at other epochs (see references in Sections 3.2–3.5) show that individual clouds can be identified at intervals of up to 18 months but not after 2–5 yr, depending on the source. There is only indirect evidence at present as to whether this indicates that the clouds dissipate, or whether their maser emission in our direction simply decreases. The small volume of the shell occupied by clouds ( $f_v < 0.01$ , see Table 8), together with the long transit time for gas through the H<sub>2</sub>O maser zone compared with the sound-crossing time for a cloud ( $t_s$  and  $t_{\text{cs}}$  typically 20 and 2 yr respectively), suggests that a change in the maser output towards us is the most likely explanation. Such a change could easily come about as a result of the large internal velocity gradients  $u'$  that we observe in random directions within individual maser clouds (Table 7 and Section 5.2). A direct proof of this hypothesis would be to observe clouds reappearing at a later date.

The ratio  $\bar{l}/r_p$  is remarkably similar for all four stars, between 0.12 and 0.20, where the scatter is as expected from the measurement uncertainties. If the clouds originate from the star their birth radius is a fraction of the stellar radius given by  $\bar{l}(R_*/r_p)/2R_* = 0.08 \pm 0.02R_*$ .

Returning to Table 8, the total mass in the clouds that we observe in each CSE is given in column (10) by  $M_{\text{tot H}_2\text{O}} = M_{\text{H}_2\text{O}}N$  ( $N$  is given in Table 7). The total mass injected at  $r_i$  during  $t_s$  is  $M_{\text{tot inj}} = t_s \dot{M}_{\text{CO}}$ , given in column (11). The uncertainties in quantities derived from our measurements are  $\lesssim 50$  per cent, and comparisons with  $\dot{M}_{\text{CO}}$  may be less accurate.

**Table 8.** The estimates of mass-loss rate from H<sub>2</sub>O maser measurements compared with those using CO observations, the maser cloud filling factor and other properties. See Section 5.3 for details.

| Source    | $\dot{M}_{\text{H}_2\text{O}}$<br>( $10^{-6} M_{\odot} \text{ yr}^{-1}$ ) | $\sigma_{\dot{M}_{\text{H}_2\text{O}}}$ | $f_{\rho}$ | $f_v$  | $M_{\text{H}_2\text{O}}$<br>( $10^{-9} M_{\odot}$ ) | $t_{\text{cs}}$<br>(yr) | $t_s$<br>(yr) | $N_p$ | $M_{\text{tot H}_2\text{O}}$<br>( $10^{-6} M_{\odot}$ ) | $M_{\text{tot inj}}$<br>( $10^{-6} M_{\odot}$ ) |
|-----------|---------------------------------------------------------------------------|-----------------------------------------|------------|--------|-----------------------------------------------------|-------------------------|---------------|-------|---------------------------------------------------------|-------------------------------------------------|
| (1)       | (2)                                                                       | (3)                                     | (4)        | (5)    | (6)                                                 | (7)                     | (8)           | (9)   | (10)                                                    | (11)                                            |
| IK Tau(a) | 117                                                                       | 19                                      | 50         | 0.0043 | 257                                                 | 3.0                     | 26            | 11    | 66                                                      | 68                                              |
| IK Tau(b) | 25                                                                        | 10                                      | 10         | 0.0043 | 62                                                  | 3.0                     | 29            | 10    | 16                                                      | 75                                              |
| U Ori     | 25                                                                        | 12                                      | 110        | 0.0014 | 141                                                 | 2.4                     | 24            | 1     | 2                                                       | 6                                               |
| RT Vir    | 15                                                                        | 2                                       | 115        | 0.0044 | 44                                                  | 1.7                     | 14            | 2     | 2                                                       | 2                                               |
| U Her     | 83                                                                        | 14                                      | 240        | 0.0008 | 104                                                 | 2.0                     | 23            | 1     | 4                                                       | 8                                               |

Even allowing for such uncertainties, some trends observed in all four CSE are strongly significant.

(i) The maser clouds are one or two orders of magnitude denser than the surrounding gas, showing that, in all these stars, mass is lost in the form of density-bounded discrete clumps.

(ii)  $M_{\text{tot inj}}/M_{\text{tot H}_2\text{O}}$  is between 1 and 5 (to within our accuracy of 50 per cent), consistent with the filling factor and overdensity of the H<sub>2</sub>O maser clumps.

(iii) For each star the radius of the clouds, extrapolated back to the stellar surface, is  $\sim 0.1R_*$ .

Prior to this work, the size of Mira clouds had not been measured. However, we (e.g. Richards et al. 1999; Murakawa et al. 2003) have previously shown that RSG H<sub>2</sub>O maser clouds are overdense by a similar amount, and are a similar relative size ( $\sim 10$  per cent) when extrapolated back to  $R_*$ , although the absolute values of  $l$ ,  $R_*$ ,  $r_i$  and  $\dot{M}$  are an order of magnitude greater for RSG. However, as befits their larger size, RSG cloud diameters are greater than the velocity resonance length and they survive for at least 9 yr (Richards, Yates & Cohen 1996, 1998).

These results suggest that the cloud size is not primarily determined by local physical or molecular processes in the wind such as shocks or cooling, as these would operate on the same scales around RSGs as around AGB stars. It could be that clumps somehow grow between the star and  $r_i$ , so the larger  $\dot{M}$  and  $r_q$  of RSGs mean that the clouds reach a larger mass. Alternatively, the cloud size could be directly determined at the stellar surface, related to convection cells (possibly producing local chemical enrichment), pulsation irregularities producing ejections, or cooling above starspots (Frank 1995).

#### 5.4 Maser amplification

Maser amplification occurs over a velocity resonance length  $\delta l$  where  $V_{\text{LSR}}$  changes by  $\Delta V_{\text{th}}$ . Inspection of the individual channel maps (Figs 2–5) shows that there is only occasional blending, and the low filling factors imply that there is  $< 1$  per cent chance of extra amplification due to one cloud overlapping another along the line of sight unless their distribution is very non-random. The actual clouds could be any shape, but for simplicity we assume that they are spherical (however, see Sections 3.2–3.5). Using the method applied to the RSG S Per by Richards et al. (1999) and the shell parameters in Table 5, we estimate  $\delta l$  for each source at  $r_p$  in the limiting cases of a cloud along the line of sight to the star (radial beaming) and in the plane of the sky with the star (tangential beaming). We find for IK Tau  $6 \gtrsim \delta l \gtrsim 5$ , for U Ori  $\delta l \approx 6$ , for U Her  $10 \gtrsim \delta l \gtrsim 5$ , and for RT Vir  $4 \gtrsim \delta l \gtrsim 3$  au. The radially beamed  $\delta l$  exceeds the tangentially beamed value by a larger amount for smaller values of the logarithmic velocity gradient  $\epsilon$ . In all cases  $\delta l > \bar{l}$  (Table 7), so



the velocity coherence depth is not limiting the amplification path, unless there is some systematic asymmetry in the distribution of cloud shapes.

If the only force on clouds is due to radiation pressure on dust, their diameter in the tangential and radial directions will increase proportionally to  $r/r_i$  and  $(r/r_i)^\epsilon$  respectively. If the clouds are on average initially spherical, they will retain their shape where  $\epsilon$  is not much less than 1. However, the clouds near  $r_i$  could be flattened by shocks as a result of the stellar pulsations. This favours tangential 22-GHz emission, perpendicular to the direction of the shock, not only due to the longer path length for maser amplification, but also because the pump infrared photons escape along the short axis (Elitzur, Hollenbach & McKee 1992). In this geometry, the beaming angle is independent of  $T_B$  and the observed component angular size is equivalent to the projected width of the flattened cloud (Elitzur 1992).

Thus shock compression would explain the large scale of emission inferred from the visibilities in the brightest channel of U Ori (Section 3.3) and its large values of  $\alpha$  and  $\bar{s}$  in Table 6. The ring-like appearance of the masers around U Her is also consistent with shocked clouds. For unsaturated masers,  $T_B$  is roughly exponentially proportional to a linear function of the path length. The brightest masers around U Her have  $T_B \approx 10^8$  K. If this arises from clouds with an axial ratio of 2:1 viewed along the long axis, clouds viewed along the short axis will have  $T_B \approx 10^4$  K, so clouds lying close to the line of sight to the star are well below the detection threshold. The average cloud diameter  $\bar{l}$  was calculated on the basis of spherical clouds. If we only detect flattened clouds,  $l$  becomes the long axis, leading to an overestimate of  $\bar{l}$ . However, if the clouds around the front and back caps are present but not detected, then  $N$  and  $N_p$  are underestimated but the accuracy of other quantities given in Table 8 is not greatly affected.

The 22-GHz photon luminosity rate from the whole of each shell,  $\Phi$ , is shown in column (13) of Table 5. For the Miras, the average  $d\Phi/dr$  is  $(0.3-0.6) \times 10^{30}$  photon  $s^{-1} m^{-1}$  but for RT Vir it is  $3 \times 10^{30}$  photon  $s^{-1} m^{-1}$ , i.e.  $\lesssim 10$  times higher. The individual masers around RT Vir also reach the highest  $T_B$ , although this object has the lowest  $\dot{M}$ , the smallest shell and the smallest clouds. It also has the smallest, most irregular stellar pulsations. It shows the largest velocity gradients ( $u'$  and  $K_v$ ) and it is the only source with  $\Delta\bar{V} > \Delta V_{th}$  (Table 7). The masers are very rapidly variable, suggesting highly efficient but unsaturated amplification. Small clouds with a steep velocity gradient could allow the clouds to remain optically thin at the infrared pump photon frequencies (Neufeld & Melnick 1991; Elitzur 1992) and achieve very efficient 22-GHz maser pumping. This is analogous to the suggested enhanced masing from shock-compressed clouds in U Her and U Ori. Shock compression alone is a less likely explanation in the case of RT Vir, as its bright masers extend well beyond  $r_i$  and its optical period and amplitude are poorly defined and small (Table 1), suggesting that the stellar pulsations are either weak or very complex.

Another possibility is that the wind from RT Vir is richer in  $H_2O$ . The latter could be due to a higher O:C ratio, suggesting that RT Vir had a higher progenitor mass and/or is more highly evolved than the Miras (since all four stars are so nearby that the overall Galactic metallicity gradient has little effect although local fluctuations are possible). Cooke & Elitzur (1985) showed that, for unsaturated masers,  $d\Phi/dr$  increases by up to an order of magnitude if the fractional abundance of  $H_2O$ ,  $f=[H_2O]/[H_2]$ , increases by a factor of 2.  $n_q$  is weakly dependent on  $f$ , so the clouds around RT Vir could be even denser by a factor of a few tenths. This could increase the acceleration of the gas, but only slightly, as the momentum coupling

with the dust is already good for most of the density range in the  $H_2O$  maser clouds (Richards et al. 1999).

For IK Tau and RT Vir we were able to estimate the photon luminosity as a function of distance from the star (Section 4.2). This is shown in Fig. 8. Comparing our results with the models by Cooke & Elitzur (1985), we found that the emissivity was 100–1000 times greater than predicted for the mass-loss rates based on CO,  $\dot{M}_{CO}$ . This difference can be explained in terms of the clumping of the mass-loss into the discrete clouds that we observe. The collision rate (and hence the maser pump rate) is proportional to  $\rho^2$ , where  $\rho$  is the local density. Thus the postulated overdensity of the maser clouds should increase the maser luminosity at the same radius.

From Table 8, the IK Tau maser clouds are overdense by a factor  $f_\rho \sim 10-50$ , suggesting that the emission at an equivalent distance from the star should be  $\geq 100$  times brighter than the value deduced from  $\dot{M}_{CO}$ . This is consistent with the models of Cooke & Elitzur (1985) for a fractional  $H_2O$  density of  $f \leq 2 \times 10^{-4}$ . However, other factors may be involved as the profile of  $d\Phi/dr$  as a function of  $r$  is very irregular, which implies changes in the rate or composition of mass loss from IK Tau as well as possible axisymmetry of the CSE.

For RT Vir, the clouds are overdense by a factor of  $f_\rho \sim 115$ . This suggests that  $d\Phi/dr$  should exceed the value deduced from  $\dot{M}_{CO}$  by a factor of roughly  $115^2/(3^2)^2$ , i.e. 1–200. In fact, RT Vir is brighter than the models of Cooke & Elitzur (1985) by three orders of magnitude, even for the highest fractional  $H_2O$  density considered,  $f = 6 \times 10^{-4}$ .

## 6 SUMMARY AND CONCLUSIONS

MERLIN 22-GHz observations of the four low-mass AGB stars IK Tau, U Ori, RT Vir and U Her show that the  $H_2O$  masers surrounding each star are found in thick expanding shells of a few hundred mas in diameter. The inner and outer limits to the maser distributions were derived, under the assumption of spherically symmetric expansion. The inner radii  $r_i$  are at 6–16 au, with outer limits  $\sim 4$  times greater. The maser velocity increases two- or threefold over this distance, giving a logarithmic velocity gradient  $\epsilon$  in the range  $0.5 \leq \epsilon \leq 1$ .

For the first time, the individual 22-GHz masers in each CSE have been resolved. The unbeamed  $H_2O$  vapour cloud diameter  $l$  is about 2–4 au at a distance of 10–25 au from the star. If the clouds are formed close to the stellar surface, assuming linear expansion, this corresponds to an original cloud radius of  $\sim 0.1R_*$ . We find that  $l$  is less than the velocity resonance length for spherical clouds. The average cloud velocity span is 0.8–1.7 km  $s^{-1}$ , with a FWHM between 0.5 and 0.8 km  $s^{-1}$ .

The water vapour cloud density at  $r_i$  is one or two orders of magnitude greater than the mean density derived from the mass-loss rates inferred from CO and other observations. The volume filling factor of the shells is  $< 0.5$  per cent. In addition, we find that the clouds are vulnerable to disruption by shocks during the passage through the shell, as the sound crossing time ( $t_{cs}$ ) of the clouds and the time the cloud takes to travel through the maser shell ( $t_s$ ) are related by  $t_{cs} \sim (1/10)t_s$ . These facts suggest that the masers are density-bounded. We find that the maser survival times and sizes of clouds around these AGB stars are  $\sim 10$  times smaller than for those around RSGs, approximately the same ratio as the stellar masses and sizes. This implies that it is the properties of the central star that determine maser cloud sizes, rather than behaviour intrinsic to the wind.

U Ori and U Her have poorly filled  $H_2O$  maser shells and both have shown OH maser flares. Some individual 22-GHz maser components in U Ori have a large beamed size which does not

decrease with increasing  $T_B$ , indicative of masing from a slab rather than a sphere. In U Her, the masers form a hollow ring. The appearance of the 22-GHz masers in both of these sources suggests that they emanate from shock-compressed shells, producing strong tangential amplification; such shocks could be the cause of the OH flares.

IK Tau and RT Vir have well-filled H<sub>2</sub>O maser shells. Observations of both of these sources made  $\lesssim 10$  years apart show a persistent east–west offset between moderately red- and blueshifted emission, although individual masers do not survive more than  $\sim 1.5$  yr. This can be explained by an equatorial density enhancement in a spherical shell, so that the brightest masers lie in an oblate spheroid and the equatorial plane is at an angle  $i$  to the line of sight, such that  $\pi/2 > i > \pi/4$ . At any one epoch, the shells of U Her and U Ori appear asymmetric, but after comparing our maps with those published at different epochs (see Section 4 for references), we cannot distinguish any systematic deviations from poorly filled spherical shells.

We are obtaining multi-epoch maps of H<sub>2</sub>O and OH masers using MERLIN and the European VLBI Network (EVN) to provide similar resolution for all species. This will allow us to study the evolution of individual maser clouds. We will measure their proper motions and distinguish between acceleration and any latitude dependence of expansion velocity: e.g. a bipolar outflow. We will thus examine the stability of the velocity field in the CSE as a whole and maser amplification within individual clouds. We will measure changes in maser size and brightness with time and so constrain the degree of maser saturation and the local overdensity of maser clouds as a function of radius. We will develop a fuller model of the velocity fields to compare with predictions based on dust properties and distribution.

## ACKNOWLEDGMENTS

MERLIN is the Multi Element Radio Linked Interferometer Network, a national facility operated by the University of Manchester at Jodrell Bank Observatory on behalf of PPARC. We thank the MERLIN staff for performing the observations. In this research we have used, and acknowledge with thanks, data from the American Association of Variable Star Observers (AAVSO) data base submitted to the AAVSO by variable star observers worldwide. DR-G gratefully acknowledges a research grant from CONACYT, the Mexican Research Council, and an EC Marie Curie studentship at the IoA Cambridge. We thank the referee for helpful suggestions.

## REFERENCES

Biegging J. H., Shaked S., Gensheimer P. D., 2000, *ApJ*, 543, 897  
 Blöcker T., 1995, *A&A*, 297, 727  
 Bowen G. H., 1988, *ApJ*, 329, 299  
 Bowers P. F., 1991, *ApJS*, 76, 1099  
 Bowers P. F., Johnston K. J., 1988, *ApJ*, 330, 339  
 Bowers P. F., Johnston K. J., 1994, *ApJS*, 92, 189  
 Bowers P. F., Claussen M. J., Johnston K. J., 1993, *AJ*, 105, 284  
 Bujarrabal V., Gómez-González J., Planesas P., 1989, *A&A*, 219, 256  
 Chapman J. M., 1985, PhD thesis, University of Manchester  
 Chapman J. M., Cohen R. J., 1985, *MNRAS*, 212, 375  
 Chapman J. M., Cohen R. J., 1986, *MNRAS*, 220, 513  
 Chapman J. S., Cohen R. J., Saikia D. J., 1991, *MNRAS*, 249, 227  
 Chapman J. S., Sivagnanam P., Cohen R. J., LeSqueren A. M., 1994, *MNRAS*, 268, 475  
 Cohen R. J., 1989, *Rep. Prog. Phys.*, 52, 881  
 Colomer F., Reid M. J., Menten K. M., Bujarrabal V., 2000, *A&A*, 355, 979  
 Condon J. J., 1997, *PASP*, 109, 166

Condon J. J., Cotton W. D., Greisen E. W., Yin Q. F., Perley R. A., Taylor G. B., Broderick J. J., 1998, *AJ*, 115, 1693  
 Cooke B., Elitzur M., 1985, *ApJ*, 295, 175  
 Elitzur M., 1992, *Astronomical Masers*. Kluwer, Dordrecht  
 Elitzur M., Ivezić Ž., 2001, *MNRAS*, 327, 403  
 Elitzur M., Hollenbach D. J., McKee C. F., 1992, *ApJ*, 394, 221  
 Engels D., Schmid-Burgk J., Walmsley C. M., 1988, *A&A*, 191, 283  
 Engels D., Winnberg A., Walmsley C. M., Brand J., 1997, *A&A*, 322, 291  
 Etoka S., LeSqueren A. M., 1997, *A&A*, 321, 877  
 Etoka S., Blaskiewicz L., Szymczak M., LeSqueren A. M., 2001, *A&A*, 378, 522  
 Frank A., 1995, *AJ*, 110, 2457  
 Gail H. P., Sedlmayr E., 1994, in Hartquist T. W., Williams D. A., eds, *The Molecular Astrophysics of Stars and Galaxies*. Oxford Univ. Press, Oxford, p. 285  
 Gail H. P., Sedlmayr E., 1998, in Sarre P., ed., *Faraday Discussion 109, Chemistry and Physics of Molecules and Grains in Space*. R. Soc. Chem., London, p. 303  
 Gail H. P., Sedlmayr E., 1999, *A&A*, 347, 594  
 Groenewegen M. A. T., Baas F., Blommaert J. A. D. L., Stehle R., Josselin E., Tilanus R. P. J., 1999, *A&AS*, 140, 197  
 Hale D. D. S. et al., 1997, *ApJ*, 490, 407  
*Hipparcos* Catalogue, 1997, ESA SP-1200, CDS-VizieR (<http://vizier.u-strasbg.fr/viz-bin/Cat?I/239>)  
 Imai H. et al., 1997a, *A&A*, 317, L67  
 Imai H. et al., 1997b, *A&A*, 319, L1  
 Jura M., 1993, in Cassinelli J. P., Churchwell E. B., eds, *ASP Conf. Ser., Massive Stars, Their Lives in the Interstellar Medium*, p. 307  
 Kerschbaum F., Hron J., 1992, *A&A*, 263, 97  
 Kerschbaum F., Olofsson H., 1999, *A&AS*, 138, 299  
 Kholopov P. N. et al., 1998, *Combined General Catalogue of Variable Stars, 4.1*, CDS-VizieR (<http://vizier.u-strasbg.fr/viz-bin/Cat?II/214A>)  
 Kirrane T.-M., 1987, PhD thesis, University of Manchester  
 Knapp G. R., Morris M., 1985, *ApJ*, 292, 640  
 Knapp G. R., Young K., Lee E., Jorissen A., 1998, *ApJS*, 117, 209  
 Lane A. P., Johnston K. J., Bowers P. F., Spencer J. H., Diamond P. J., 1987, *ApJ*, 323, 756  
 Lekht E. E., Mendoza-Torres J. E., Pashchenko M. I., Berulis I. I., 1999, *A&A*, 343, 241  
 Mendoza-Torres J. E., Lekht E. E., Pashchenko M. I., Berulis I. I., 1997, *A&AS*, 126, 257  
 Monet D. et al., 1998, *USNO-A V2.0, A Catalog of Astrometric Standards*, CDS-VizieR (<http://vizier.u-strasbg.fr/viz-bin/Cat?I/252>)  
 Monnier J. D., Geballe T. R., Danchi W. C., 1998, *ApJ*, 502, 833  
 Monnier J. D., Geballe T. R., Danchi W. C., 1999, *ApJ*, 521, 261  
 Murakawa K., Yates J. A., Richards A. M. S., Cohen R. J., 2003, *MNRAS*, submitted  
 Netzer N., Elitzur M., 1993, *ApJ*, 410, 701  
 Neufeld D. A., Melnick G. J., 1991, *ApJ*, 368, 215  
 Nyman L.-A., Johansson L. E. B., Booth R. S., 1986, *A&A*, 160, 352  
 Olmon F. M. et al., 1986, *A&AS*, 65, 607  
 Olofsson H., Lindqvist M., Nyman L.-A., Winnberg A., 1998, *A&A*, 329, 1059  
 Pataki L., Kolena J., 1974, *BAAS*, 6, 340  
 Richards A. M. S., 1997, PhD thesis, University of Manchester  
 Richards A. M. S., Yates J. A., Cohen R. J., 1996, *MNRAS*, 282, 665  
 Richards A. M. S., Yates J. A., Cohen R. J., 1998, *MNRAS*, 299, 319  
 Richards A. M. S., Yates J. A., Cohen R. J., 1999, *MNRAS*, 306, 954  
 Richards A. M. S., Cohen R. J., Murakawa K., Yates J. A., van Langevelde H. J., Gray M. D., Mashed M. R. W., Szymczak M. D., 2000, in Conway J. E., Polatidis A. G., Booth R. S., Pihlström Y. M., eds, *Proc. 5th EVN Symp. Onsala Space Observatory*, Gothenburg, p. 185  
 Rudnitskij G. M., Mendoza-Torres J. E., Pashchenko M. I., Berulis I. I., 2000, *A&AS*, 146, 385  
 Stanek K. Z., Knapp G. R., Young K., Phillips T. G., 1995, *ApJS*, 100, 169  
 Szymczak M., Engels D., 1995, *A&A*, 296, 727  
 Teräsraanta H. et al., 1998, *A&AS*, 132, 305  
 van der Veen W. E. C. J., Habing H. J., 1988, *A&A*, 184, 125









**Table A1** – *continued*

| $\overline{V_{\text{LSR}}}$<br>( $\text{km s}^{-1}$ ) | $\Delta V$ | $\Delta V_{1/2}$ | $\sigma_{\Delta V_{1/2}}$ | $x$   | $\sigma_x$ | $y$    | $\sigma_y$ | $a$   | $\sigma_a$ | $\theta$  | $\sigma_\theta$ | $L$   | $\sigma_L$ | $I$                       | $S$                       | $T_{\text{B}}$       |
|-------------------------------------------------------|------------|------------------|---------------------------|-------|------------|--------|------------|-------|------------|-----------|-----------------|-------|------------|---------------------------|---------------------------|----------------------|
| (1)                                                   | (2)        | (3)              | (4)                       | (mas) | (6)        | (mas)  | (8)        | (mas) | (10)       | (degrees) | (12)            | (mas) | (14)       | ( $\text{Jy beam}^{-1}$ ) | ( $\text{Jy km s}^{-1}$ ) | ( $10^6 \text{ K}$ ) |
| 46.0                                                  | 0.3        | 0.15             | 0.10                      | -94.0 | 4.3        | 41.5   | 4.3        | 102.8 | 4.3        | 293.9     | 2.4             | 1.2   | 10.0       | 0.110                     | 0.036                     | 0.7                  |
| 46.0                                                  | 0.5        | 2.65             | 1.56                      | -90.7 | 3.0        | 67.9   | 3.0        | 113.3 | 3.0        | 306.8     | 1.5             | 3.3   | 9.5        | 0.117                     | 0.054                     | 0.9                  |
| 46.0                                                  | 0.6        | 0.63             | 0.28                      | 32.4  | 2.0        | -142.6 | 2.0        | 146.2 | 2.0        | 167.3     | 0.8             | 6.9   | 6.7        | 0.171                     | 0.147                     | 3.1                  |
| 46.0                                                  | 0.4        | 1.85             | 1.63                      | 61.8  | 2.6        | -24.6  | 2.6        | 66.5  | 2.6        | 111.7     | 2.2             | 0.8   | 7.3        | 0.161                     | 0.066                     | 2.4                  |
| 46.2                                                  | 0.4        | 0.47             | 0.25                      | 45.8  | 2.7        | -145.4 | 2.7        | 152.5 | 2.7        | 162.5     | 1.0             | 5.7   | 7.7        | 0.121                     | 0.056                     | 2.0                  |
| 46.2                                                  | 0.4        | 0.24             | 0.01                      | -8.5  | 2.8        | 7.6    | 2.8        | 11.7  | 2.8        | 312.5     | 13.7            | 7.7   | 8.5        | 0.121                     | 0.062                     | 2.3                  |
| 46.2                                                  | 0.3        | 0.15             | 0.10                      | 2.1   | 3.7        | 94.5   | 3.7        | 94.6  | 3.7        | 1.3       | 2.2             | 7.8   | 8.9        | 0.101                     | 0.045                     | 1.2                  |
| 46.3                                                  | 0.3        | 0.15             | 0.10                      | 59.9  | 2.9        | -99.9  | 2.9        | 116.5 | 2.9        | 149.1     | 1.4             | 1.1   | 6.7        | 0.127                     | 0.043                     | 2.5                  |
| 46.3                                                  | 0.3        | 0.15             | 0.10                      | 3.7   | 3.2        | -9.6   | 3.2        | 10.4  | 3.2        | 158.8     | 17.7            | 3.4   | 9.9        | 0.130                     | 0.029                     | 1.4                  |
| 46.4                                                  | 0.3        | 0.15             | 0.10                      | -60.2 | 3.4        | 63.3   | 3.4        | 87.4  | 3.4        | 316.4     | 2.2             | 3.0   | 9.9        | 0.127                     | 0.049                     | 2.7                  |
| 46.5                                                  | 0.4        | 0.76             | 3.17                      | -2.2  | 3.1        | 16.3   | 3.1        | 16.5  | 3.1        | 352.1     | 10.8            | 4.7   | 9.6        | 0.114                     | 0.043                     | 1.1                  |
| 46.5                                                  | 0.6        | 0.15             | 0.04                      | 70.5  | 1.7        | -22.9  | 1.7        | 74.1  | 1.7        | 107.9     | 1.3             | 4.6   | 6.7        | 0.192                     | 0.139                     | 7.6                  |
| 46.5                                                  | 0.5        | 0.32             | 0.01                      | 92.8  | 0.6        | -5.4   | 0.6        | 92.9  | 0.6        | 93.3      | 0.3             | 2.3   | 1.5        | 0.556                     | 0.276                     | 58.5                 |

**Table A2.** Measurements of H<sub>2</sub>O maser clouds around U Ori: see Section 5.2 for details.

| $\overline{V_{\text{LSR}}}$<br>( $\text{km s}^{-1}$ ) | $\Delta V$ | $\Delta V_{1/2}$ | $\sigma_{\Delta V_{1/2}}$ | $x$   | $\sigma_x$ | $y$   | $\sigma_y$ | $a$   | $\sigma_a$ | $\theta$  | $\sigma_\theta$ | $L$   | $\sigma_L$ | $I$                       | $S$                       | $T_{\text{B}}$       |
|-------------------------------------------------------|------------|------------------|---------------------------|-------|------------|-------|------------|-------|------------|-----------|-----------------|-------|------------|---------------------------|---------------------------|----------------------|
| (1)                                                   | (2)        | (3)              | (4)                       | (mas) | (6)        | (mas) | (8)        | (mas) | (10)       | (degrees) | (12)            | (mas) | (14)       | ( $\text{Jy beam}^{-1}$ ) | ( $\text{Jy km s}^{-1}$ ) | ( $10^6 \text{ K}$ ) |
| -40.8                                                 | 0.3        | 0.15             | 0.10                      | 44.0  | 2.4        | 2.1   | 1.3        | 44.0  | 2.4        | 87.4      | 1.7             | 12.1  | 5.8        | 0.097                     | 0.041                     | 1.7                  |
| -40.7                                                 | 1.5        | 1.42             | 0.60                      | 41.1  | 0.4        | 18.5  | 0.6        | 44.9  | 0.4        | 65.6      | 0.7             | 21.4  | 5.6        | 0.202                     | 0.374                     | 3.4                  |
| -40.1                                                 | 0.5        | 0.55             | 0.19                      | 42.6  | 1.1        | 3.8   | 1.3        | 42.9  | 1.1        | 85.0      | 1.7             | 8.5   | 7.4        | 0.114                     | 0.067                     | 1.9                  |
| -38.0                                                 | 0.3        | 0.15             | 0.10                      | 69.5  | 0.4        | 94.9  | 0.4        | 117.7 | 0.4        | 36.2      | 0.2             | 1.5   | 1.1        | 0.330                     | 0.101                     | 5.6                  |
| -37.9                                                 | 0.3        | 0.15             | 0.10                      | -15.3 | 0.9        | -79.3 | 0.7        | 80.7  | 0.7        | 191.0     | 0.6             | 6.5   | 3.5        | 0.257                     | 0.150                     | 4.4                  |
| -37.6                                                 | 0.7        | 0.60             | 0.29                      | 5.4   | 0.2        | -88.7 | 0.2        | 88.9  | 0.2        | 176.5     | 0.1             | 9.0   | 4.0        | 0.907                     | 0.918                     | 15.4                 |
| -37.5                                                 | 0.3        | 0.15             | 0.10                      | -2.4  | 0.7        | 21.7  | 1.1        | 21.8  | 1.1        | 353.7     | 1.9             | 5.2   | 3.1        | 0.194                     | 0.057                     | 3.3                  |
| -37.5                                                 | 0.3        | 0.15             | 0.10                      | -31.9 | 0.3        | -77.1 | 0.5        | 83.5  | 0.5        | 202.6     | 0.2             | 3.5   | 0.9        | 0.575                     | 0.345                     | 9.8                  |
| -37.4                                                 | 2.0        | 0.53             | 0.03                      | -12.6 | 0.1        | -52.1 | 0.1        | 53.0  | 0.1        | 193.2     | 0.1             | 40.2  | 5.1        | 12.045                    | 15.757                    | 204.3                |
| -37.3                                                 | 0.3        | 0.15             | 0.10                      | 37.4  | 0.5        | -23.2 | 0.6        | 44.0  | 0.5        | 121.9     | 0.8             | 3.3   | 1.8        | 0.280                     | 0.082                     | 4.8                  |
| -37.3                                                 | 0.4        | 0.46             | 0.18                      | -28.7 | 0.2        | -98.0 | 0.3        | 102.1 | 0.3        | 196.3     | 0.1             | 3.9   | 1.0        | 0.703                     | 0.352                     | 11.9                 |
| -36.8                                                 | 0.6        | 0.53             | 0.22                      | 16.8  | 0.5        | 29.3  | 0.5        | 33.8  | 0.5        | 30.2      | 0.9             | 9.8   | 3.1        | 0.265                     | 0.155                     | 4.5                  |
| -36.8                                                 | 0.7        | 1.49             | 1.66                      | -27.7 | 0.4        | -93.4 | 0.6        | 97.7  | 0.6        | 196.4     | 0.3             | 10.0  | 3.9        | 0.389                     | 0.245                     | 6.6                  |
| -35.5                                                 | 1.8        | 0.66             | 0.01                      | 92.3  | 0.1        | -14.0 | 0.1        | 93.4  | 0.1        | 98.7      | 0.1             | 7.1   | 10.9       | 1.897                     | 1.223                     | 32.2                 |





**Table A4.** Measurements of H<sub>2</sub>O maser clouds around U Her: see Section 5.2 for details.

| $\overline{V}_{\text{LSR}}$<br>(km s <sup>-1</sup> )<br>(1) | $\Delta V$<br>(2) | $\Delta V_{1/2}$<br>(km s <sup>-1</sup> )<br>(3) | $\sigma_{\Delta V_{1/2}}$<br>(4) | $x$<br>(mas)<br>(5) | $\sigma_x$<br>(6) | $y$<br>(mas)<br>(7) | $\sigma_y$<br>(8) | $a$<br>(mas)<br>(9) | $\sigma_a$<br>(10) | $\theta$<br>(degrees)<br>(11) | $\sigma_\theta$<br>(12) | $L$<br>(mas)<br>(13) | $\sigma_L$<br>(14) | $I$<br>(Jy beam <sup>-1</sup> )<br>(15) | $S$<br>(Jy km s <sup>-1</sup> )<br>(16) | $T_{\text{B}}$<br>(10 <sup>6</sup> K)<br>(17) |
|-------------------------------------------------------------|-------------------|--------------------------------------------------|----------------------------------|---------------------|-------------------|---------------------|-------------------|---------------------|--------------------|-------------------------------|-------------------------|----------------------|--------------------|-----------------------------------------|-----------------------------------------|-----------------------------------------------|
| -21.6                                                       | 1.4               | 1.32                                             | 0.82                             | -46.4               | 0.1               | -70.2               | 0.1               | 84.2                | 0.1                | 213.5                         | 0.1                     | 5.2                  | 2.5                | 0.8                                     | 0.664                                   | 7.9                                           |
| -20.4                                                       | 1.3               | 1.20                                             | 0.38                             | -42.9               | 0.1               | -68.1               | 0.1               | 80.5                | 0.1                | 212.2                         | 0.1                     | 4.9                  | 0.4                | 1.9                                     | 1.634                                   | 18.0                                          |
| -20.3                                                       | 0.6               | 0.77                                             | 0.39                             | -130.9              | 0.5               | -8.1                | 0.4               | 131.2               | 0.5                | 266.5                         | 0.2                     | 3.2                  | 2.2                | 0.3                                     | 0.123                                   | 2.8                                           |
| -19.1                                                       | 1.6               | 1.15                                             | 0.15                             | -37.5               | 0.1               | -63.9               | 0.1               | 74.1                | 0.1                | 210.6                         | 0.1                     | 8.9                  | 0.3                | 4.6                                     | 4.193                                   | 44.2                                          |
| -19.5                                                       | 0.4               | 0.56                                             | 0.48                             | -146.0              | 0.4               | -10.1               | 0.6               | 146.4               | 0.4                | 266.1                         | 0.2                     | 5.6                  | 1.4                | 0.5                                     | 0.180                                   | 4.6                                           |
| -18.1                                                       | 1.3               | 0.92                                             | 0.15                             | 19.5                | 0.1               | -92.1               | 0.1               | 94.2                | 0.1                | 168.0                         | 0.1                     | 9.4                  | 1.0                | 2.5                                     | 2.230                                   | 23.7                                          |
| -18.0                                                       | 0.8               | 0.98                                             | 0.45                             | -66.4               | 0.6               | -31.5               | 0.4               | 73.4                | 0.6                | 244.3                         | 0.3                     | 14.1                 | 3.4                | 0.4                                     | 0.606                                   | 4.3                                           |
| -18.5                                                       | 0.3               | 0.15                                             | 0.10                             | -54.2               | 1.0               | -35.7               | 0.6               | 64.9                | 0.9                | 236.8                         | 0.7                     | 4.6                  | 2.9                | 0.3                                     | 0.156                                   | 3.0                                           |
| -18.9                                                       | 0.3               | 0.15                                             | 0.10                             | -53.9               | 0.8               | -37.1               | 0.6               | 65.4                | 0.7                | 235.6                         | 0.6                     | 3.3                  | 2.0                | 0.3                                     | 0.166                                   | 3.3                                           |
| -17.2                                                       | 0.9               | 0.67                                             | 0.10                             | 9.5                 | 0.1               | -96.7               | 0.1               | 97.1                | 0.1                | 174.4                         | 0.1                     | 7.8                  | 0.9                | 1.7                                     | 1.244                                   | 16.7                                          |
| -17.9                                                       | 1.0               | 0.87                                             | 0.36                             | -30.3               | 0.1               | -61.7               | 0.1               | 68.8                | 0.1                | 206.2                         | 0.1                     | 10.6                 | 2.0                | 1.9                                     | 1.887                                   | 18.1                                          |
| -16.0                                                       | 1.4               | 1.09                                             | 0.40                             | 17.7                | 0.1               | -67.8               | 0.1               | 70.2                | 0.1                | 165.7                         | 0.1                     | 17.3                 | 1.3                | 2.5                                     | 3.216                                   | 24.2                                          |
| -16.6                                                       | 1.8               | 0.94                                             | 0.01                             | -15.0               | 0.1               | 69.1                | 0.1               | 70.7                | 0.1                | 347.5                         | 0.1                     | 8.5                  | 0.7                | 4.1                                     | 4.605                                   | 39.0                                          |
| -16.5                                                       | 0.5               | 0.68                                             | 0.39                             | -41.6               | 0.5               | 32.1                | 0.6               | 52.5                | 0.5                | 308.0                         | 0.6                     | 8.4                  | 1.6                | 0.5                                     | 0.333                                   | 4.6                                           |
| -16.6                                                       | 0.3               | 0.15                                             | 0.10                             | -42.7               | 0.6               | 42.8                | 0.9               | 60.4                | 0.8                | 315.1                         | 0.7                     | 2.5                  | 1.9                | 0.3                                     | 0.064                                   | 2.8                                           |
| -16.8                                                       | 0.7               | 0.49                                             | 0.01                             | -32.3               | 0.4               | 101.3               | 0.5               | 106.4               | 0.5                | 342.3                         | 0.2                     | 7.1                  | 2.1                | 0.5                                     | 0.317                                   | 4.4                                           |
| -15.2                                                       | 2.8               | 0.78                                             | 0.07                             | -65.5               | 0.1               | -8.2                | 0.1               | 66.1                | 0.1                | 262.7                         | 0.1                     | 17.1                 | 1.8                | 10.9                                    | 9.631                                   | 104.7                                         |
| -15.5                                                       | 0.4               | 0.63                                             | 0.54                             | 23.7                | 0.3               | 60.5                | 0.3               | 64.9                | 0.3                | 21.4                          | 0.3                     | 1.1                  | 0.8                | 0.8                                     | 0.354                                   | 8.0                                           |
| -14.1                                                       | 0.7               | 0.80                                             | 0.32                             | -45.4               | 0.2               | 40.0                | 0.3               | 60.0                | 0.3                | 311.0                         | 0.3                     | 25.5                 | 1.1                | 0.6                                     | 0.816                                   | 6.0                                           |
| -14.0                                                       | 0.4               | 0.35                                             | 0.10                             | -10.2               | 1.3               | -76.4               | 1.0               | 76.9                | 1.0                | 187.5                         | 1.0                     | 7.5                  | 5.2                | 0.2                                     | 0.096                                   | 2.1                                           |
| -14.4                                                       | 0.7               | 0.76                                             | 0.43                             | 69.2                | 0.3               | -4.5                | 0.2               | 69.3                | 0.3                | 93.7                          | 0.2                     | 4.8                  | 1.3                | 0.9                                     | 0.610                                   | 8.8                                           |
| -14.2                                                       | 0.4               | 0.38                                             | 0.12                             | 4.4                 | 0.8               | 77.9                | 0.6               | 78.1                | 0.6                | 31.6                          | 0.5                     | 6.9                  | 2.7                | 0.3                                     | 0.127                                   | 2.9                                           |
| -14.8                                                       | 1.5               | 0.70                                             | 0.01                             | 38.5                | 0.1               | -63.1               | 0.1               | 73.6                | 0.1                | 148.8                         | 0.1                     | 16.0                 | 0.7                | 7.2                                     | 8.312                                   | 68.8                                          |
| -14.8                                                       | 0.9               | 1.01                                             | 1.13                             | 20.9                | 0.2               | -45.9               | 0.2               | 50.6                | 0.2                | 155.3                         | 0.2                     | 10.2                 | 1.2                | 2.0                                     | 1.278                                   | 18.8                                          |
| -13.4                                                       | 0.4               | 2.18                                             | 3.62                             | -77.0               | 2.0               | -6.0                | 2.3               | 77.4                | 2.0                | 265.6                         | 1.7                     | 13.1                 | 6.6                | 0.1                                     | 0.093                                   | 1.2                                           |
| -13.0                                                       | 0.6               | 0.72                                             | 2.81                             | 18.4                | 0.9               | 71.3                | 0.8               | 73.8                | 0.8                | 14.6                          | 0.7                     | 11.6                 | 6.2                | 0.3                                     | 0.071                                   | 2.6                                           |
| -13.6                                                       | 0.6               | 1.34                                             | 1.45                             | -48.2               | 0.5               | 43.1                | 0.6               | 64.5                | 0.6                | 311.8                         | 0.5                     | 7.1                  | 3.9                | 0.4                                     | 0.412                                   | 4.3                                           |
| -13.7                                                       | 0.7               | 0.71                                             | 0.22                             | 9.5                 | 0.6               | 74.1                | 0.7               | 74.7                | 0.7                | 7.3                           | 0.5                     | 4.7                  | 3.4                | 0.3                                     | 0.161                                   | 2.8                                           |
| -12.2                                                       | 1.0               | 0.79                                             | 0.12                             | -31.7               | 0.6               | 52.8                | 0.6               | 61.6                | 0.6                | 329.0                         | 0.5                     | 4.9                  | 7.7                | 0.2                                     | 0.222                                   | 2.3                                           |
| -12.2                                                       | 0.4               | 0.42                                             | 0.12                             | -80.3               | 3.4               | -8.0                | 2.7               | 80.7                | 3.3                | 264.4                         | 1.9                     | 8.3                  | 11.6               | 0.1                                     | 0.063                                   | 0.8                                           |
| -12.8                                                       | 0.7               | 1.27                                             | 1.29                             | -77.6               | 0.7               | -6.0                | 0.7               | 77.8                | 0.7                | 265.6                         | 0.5                     | 5.3                  | 3.6                | 0.2                                     | 0.212                                   | 2.3                                           |
| -12.9                                                       | 1.0               | 0.80                                             | 0.12                             | 27.2                | 0.3               | 50.8                | 0.3               | 57.6                | 0.3                | 28.1                          | 0.3                     | 5.4                  | 2.3                | 0.4                                     | 0.415                                   | 4.2                                           |
| -11.5                                                       | 0.5               | 0.59                                             | 0.27                             | -32.2               | 1.8               | 51.6                | 1.3               | 60.8                | 1.5                | 327.9                         | 1.6                     | 13.6                 | 18.4               | 0.1                                     | 0.054                                   | 0.9                                           |
| -10.2                                                       | 0.7               | 0.47                                             | 0.03                             | -65.2               | 0.8               | 1.4                 | 0.8               | 65.2                | 0.8                | 271.2                         | 0.7                     | 5.7                  | 11.2               | 0.2                                     | 0.128                                   | 2.1                                           |

This paper has been typeset from a  $\text{\TeX}/\text{\LaTeX}$  file prepared by the author.
